# Supplementary material for: Video Intervention and Goals-of-Care Documentation in Hospitalized Older Adults: The VIDEO-PCE Randomized Clinical Trial
Source: PubMed Central journal article supplement (PMC10495866; doi:10.1001/jamanetworkopen.2023.32556), 2023-09-11
Supplement: jamanetwopen-e2332556-s001.pdf [file jamanetwopen-e2332556-s001.pdf]

1  
2  
3  
4  
5  
6  
7  
8  
9  
10  
11  
12  
13  
14  
15  
16  
17  
18

Meeting the Challenges of COVID-19 by Expanding the Reach of Palliative Care: Proactive  
Advance Care Planning with Videos for the Elderly and all Patients with Dementia

**ClinicalTrials.gov number:** NCT04857060

**BMC Protocol Number:** H-41482

**Protocol Version Number:** 1.2

**Protocol Version Date:** October 7, 2022

**Funding Mechanism:** NIH/NIA 1 R01 AG072911

**Principal Investigator:** Michael Paasche-Orlow, MD, MPH

**Phone:** 617-414-6936

**E-mail:** mpo@tuftsmedicine.org

|    |                                                                      |    |
|----|----------------------------------------------------------------------|----|
| 19 | <b>TABLE OF CONTENTS</b>                                             |    |
| 20 | 1 List of Abbreviations .....                                        | 3  |
| 21 | 2 Protocol Summary .....                                             | 3  |
| 22 | 3 Background/Rationale & Purpose .....                               | 4  |
| 23 | 3.1 Background Information .....                                     | 4  |
| 24 | 3.2 Rationale and Purpose .....                                      | 5  |
| 25 | 4 Objectives .....                                                   | 6  |
| 26 | 4.1 Study Objectives .....                                           | 6  |
| 27 | 4.2 Study Outcome Measures .....                                     | 7  |
| 28 | 4.2.1 Primary Outcome Measures .....                                 | 7  |
| 29 | 4.2.2 Secondary Outcome Measures .....                               | 7  |
| 30 | 5 Study Design .....                                                 | 8  |
| 31 | 6 Potential Risks and Benefits .....                                 | 9  |
| 32 | 6.1 Risks .....                                                      | 8  |
| 33 | 6.2 Potential Benefits .....                                         | 9  |
| 34 | 6.3 Analysis of Risks in Relation to Benefits .....                  | 9  |
| 35 | 7 Study Subject Selection .....                                      | 9  |
| 36 | 7.1 Subject Inclusion Criteria .....                                 | 9  |
| 37 | 7.2 Subject Exclusion Criteria .....                                 | 10 |
| 38 | 8 Study Intervention .....                                           | 11 |
| 39 | 9 Study Procedures .....                                             | 11 |
| 40 | 10 Assessment of Safety and Data Safety Monitoring Plan (DSMP) ..... | 17 |
| 41 | 10.1 Definitions .....                                               | 17 |
| 42 | 10.2 Safety Review .....                                             | 18 |
| 43 | 10.3 Reporting Plans .....                                           | 19 |
| 44 | 10.4 Stopping Rules .....                                            | 19 |
| 45 | 11 Data Handling and Record Keeping .....                            | 17 |
| 46 | 11.1 Confidentiality .....                                           | 17 |
| 47 | 11.2 Case Report Forms .....                                         | 20 |
| 48 | 11.3 Study Records Retention .....                                   | 19 |
| 49 | 11.4 Data Management .....                                           | 21 |
| 50 | 12 Statistical Plan .....                                            | 22 |
| 51 | 12.1 Study Hypotheses .....                                          | 22 |
| 52 | 12.2 Sample Size Determination .....                                 | 23 |
| 53 | 12.3 Statistical Methods .....                                       | 23 |
| 54 | 13 Ethics/Protection of Human Subjects .....                         | 27 |
| 55 | 14 Literature References .....                                       | 28 |
| 56 |                                                                      |    |
| 57 |                                                                      |    |

## 58 1 List of Abbreviations

59

| Abbreviation | Abbreviation definition                   |
|--------------|-------------------------------------------|
| ACP          | Advance Care Planning                     |
| ADR          | Alzheimer's Disease and Related Dementias |
| CPR          | Cardio-Pulmonary Resuscitation            |
| PCE          | Palliative Care Educator                  |
| SW-CRT       | Stepped Wedge Cluster Randomized Trial    |
| BMC          | Boston Medical Center                     |
| NLP          | Natural Language Processing               |
| EHR          | Electronic Health Record                  |
| RA           | Research Assistant                        |

60

## 61 2 Protocol Summary

62

|                                        |                                                                                                                                                                                                                                                                                                                               |
|----------------------------------------|-------------------------------------------------------------------------------------------------------------------------------------------------------------------------------------------------------------------------------------------------------------------------------------------------------------------------------|
| <b>Title:</b>                          | Meeting the Challenges of COVID-19 by Expanding the Reach of Palliative Care: Proactive Advance Care Planning with Videos for the Elderly and all Patients with Dementia                                                                                                                                                      |
| <b>Short Title:</b>                    | Video Images about Decisions to Improve Ethical Outcomes with Palliative Care Educators (VIDEO-PCE)                                                                                                                                                                                                                           |
| <b>Population:</b>                     | Aim 1: Patients $\geq 65$ years admitted to one of the study inpatient units<br>Aim 2a: Any patient $\geq 18$ years admitted to one of the study inpatient units with ADRD/delirium<br>Aim 2b: Adult Caregiver of any patient in aim 2a                                                                                       |
| <b>Intervention:</b>                   | Palliative Care Educator using video decision aid shown at time of admission to patients/caregivers in wards/units randomized to the intervention phase                                                                                                                                                                       |
| <b>Objectives:</b>                     | The <b>overall objective</b> of the present proposal is to reduce the burden of COVID-19 and advanced illness and its consequences for an aging U.S. population.                                                                                                                                                              |
| <b>Design/Methodology:</b>             | This project is a multi-center stepped wedge cluster randomized trial of an advance care planning (ACP) video intervention (vs. standard of care) using a Palliative Care Educator among patients $\geq 65$ years OR any patient $\geq 18$ years old with ADRD regardless of age admitted to one of the study inpatient units |
| <b>Total Study Duration:</b>           | 2 years                                                                                                                                                                                                                                                                                                                       |
| <b>Subject Participation Duration:</b> | EHR data collection during the 16 months of enrollment (2 months baseline plus 14 months intervention steps). EHR data abstracted for one year after the end of the 16 months of enrollment.                                                                                                                                  |

63

64  
65  
66  
67  
68  
69  
70  
71  
72  
73  
74  
75  
76  
77  
78  
79  
80  
81  
82  
83  
84  
85  
86  
87  
88  
89  
90  
91  
92  
93  
94  
95  
96  
97  
98  
99  
100  
101  
102  
103  
104  
105  
106  
107

### 3 Background/Rationale & Purpose

#### 3.1 Background Information

COVID-19 disproportionately affects the elderly and those with Alzheimer’s Disease and Related Dementias (ADRD/Delirium).<sup>1, 2</sup> The COVID-19 pandemic has killed over 500,000 Americans and is a common and morbid condition, especially in people over the age of 65 and those with functional impairment and ADRD/Delirium.<sup>2</sup> When COVID-19 strikes, these patients die at higher rates.<sup>2, 3</sup> The surge in patients with COVID-19 poses a significant public health challenge and has the potential to compromise the orderly function of health institutions.<sup>4</sup>

The palliative care needs of inpatients with ADRD/Delirium and those over 65 is rapidly increasing, and access to palliative care clinicians is limited. The majority of hospitals in the U.S. have palliative care programs; indeed, over the past decade access to palliative care services has increased dramatically.<sup>5-9</sup> However, staffing capacity to meet the clinical needs continues to be a significant challenge.<sup>10-13</sup> Many hospitals provide palliative care services only to a small portion of the patients that would be appropriately served by palliative care<sup>14, 15</sup> and the scope of this problem has increased with COVID-19. New models are needed for palliative care services to meet the need.<sup>16</sup> Older patients and those with ADRD/Delirium face the prospect of receiving burdensome and unwanted end-of-life care due to lack of palliative care services.

Decision making in patients with ADRD/Delirium and their caregivers during COVID-19 is urgent. Patients with ADRD/Delirium have a small window of opportunity to state their preferences for the advanced stages of the disease before their disease makes them incapable of decision making. Without an Advance Care Planning (ACP) discussion, caregivers are often left to make treatment decisions for their loved ones with the advanced stages of the disease.<sup>17</sup> Numerous studies have shown that caregiver decision making is no better than chance and often lacks stability over time.<sup>18</sup> Caregivers often suffer a great deal of burden and distress attempting to develop a comprehensive care plan for the advanced stages of the disease.<sup>17</sup> Caregiver stress and communication challenges are exacerbated by their exclusion from the hospital.<sup>19-21</sup> COVID-19 poses significant ACP challenges for patients with ADRD/Delirium and their caregivers.

This study will be conducted in compliance with the protocol, applicable regulatory requirements, and BMC/BU Medical Campus Human Research Protection policies and procedures.

#### 3.2 Rationale and Purpose

Advance care planning (ACP) in older patients or patients with ADRD/Delirium needs improvement: ACP seeks to ensure that patients receive medical care consistent with their values, goals and preferences during serious and chronic illness.<sup>22</sup> The lack of ACP documentation is associated with greater use of aggressive interventions, more terminal hospitalizations, lower hospice use, higher health care costs, and worse family bereavement

108 outcomes.<sup>17, 22</sup> Unfortunately, ACP documentation in older patients and patients with  
109 ADRD/Delirium remains inadequate.<sup>23, 24</sup> Furthermore, marked racial and regional disparities  
110 persist in ACP documentation for seriously ill patients.<sup>25</sup> For the ACP process to lead to optimal  
111 decisions, patients and their caregivers require accurate, impartial and comprehensible  
112 information about their treatment options, and a care setting where communication needs are  
113 addressed early in their illness by a dedicated clinician.<sup>26-28</sup> However, studies show that  
114 traditional written and verbal ACP does not effectively inform many patients and caregivers, and  
115 often occurs late in the disease process.<sup>22</sup> High-quality ACP increases patient safety by ensuring  
116 that patients receive effective care that meets their goals.

117

118 Video decision support improves ACP: The traditional approach to ACP, which primarily relies on  
119 ad hoc verbal descriptions of hypothetical clinical situations and treatment choices, is limited  
120 because complex scenarios are difficult to envision, provider information is inconsistent, and  
121 verbal explanations are hampered by literacy, emotional and language barriers.<sup>22, 29-31</sup> Over the  
122 past few years, investigators have recognized the shortcomings of prior efforts and have  
123 developed new interventions to better facilitate ACP.<sup>22, 32-37</sup> The video intervention proposed for  
124 this study focuses on patient, caregiver and clinician communication about treatments for  
125 medical care facilitated by a Palliative Care Educator (PCE).

126

127 The COVID-19 PCE video intervention proposed for this study focuses on patient/caregiver and  
128 clinician communication about goals of care. Video aids to better educate and inform decision  
129 making are commonly used. These videos attempt to overcome language and literacy barriers  
130 and to present potential scenarios with a sense of reality lacking in verbal descriptions.<sup>54-56</sup> These  
131 videos are available in 25 different languages, and attempt to overcome literacy barriers and to  
132 present potential scenarios with a sense of reality lacking in verbal descriptions. In addition to  
133 using videos, our PCEs will be trained in the Vital Talk program, the most widely disseminated  
134 teaching method that focuses on patient-centered serious illness communication skills training.  
135 To our knowledge, this is the first trial of PCEs trained in communication skills to engage patients  
136 with palliative care services with videos. If effective, this model can be rapidly disseminated to  
137 improve care for millions of Americans.

138

139 Hospitalized patients often receive burdensome interventions as the default option, without a  
140 shared decision-making conversation or awareness of more comfort-oriented care.<sup>57, 58</sup> Thus,  
141 patients are at high risk of receiving poor-quality care at the end of life given the burden of such  
142 care on patients. Poor ACP and communication about patients' preferences for end-of-life care  
143 contribute substantially to the receipt of aggressive, costly, and unwanted medical care for  
144 patients with serious illness.<sup>31, 46, 48, 59-62</sup> Therefore, improving palliative care services may prove  
145 to be an effective strategy to enhance the delivery and quality of medical care for hospitalized  
146 patients. ACP video tools have shown promising efficacy in educating patients about their  
147 options and informing their preferences for care.<sup>55, 63-66</sup> Given the intensity of health care  
148 utilization for hospitalized patients, patients may greatly benefit from a PCE-led video  
149 intervention to expand the reach and impact of palliative care to inform and empower patients  
150 and their caregivers in the decision-making process and to improve the delivery of care that is  
151 concordant with their wishes during COVID-19.

152  
153  
154  
155  
156  
157  
158  
159  
160  
161  
162  
163  
164  
165  
166  
167  
168  
169  
170  
171  
172  
173  
174  
175  
176  
177  
178  
179  
180  
181  
182  
183  
184  
185  
186  
187  
188  
189  
190  
191  
192  
193  
194  
195

## 4 Objectives

### 4.1 Study Objectives

The **overall objective** of this study is to reduce the burden of COVID-19 by expanding the reach of inpatient palliative care services, especially for patients with ADRD/Delirium. We propose to conduct a stepped wedge cluster randomized trial (SW-CRT) of a PCE video intervention among hospitalized patients aged 65 and over, or any patient  $\geq 18$  years with ADRD/Delirium and their caregivers in the ward and ICU settings of two major hospitals: Boston Medical Center (BMC) and North Shore University Hospital. Patient outcomes will be abstracted from electronic health records with Natural Language Processing (NLP).

We will test our hypotheses via the following **Specific Aims**:

**Aim 1:** To test the effects of a PCE video intervention leveraging video decision aids on the quality of end-of-life care. We will conduct a SW-CRT to evaluate intervention effectiveness by comparing the following outcomes among 9,000 hospitalized patients: ACP documentation; preferences for resuscitation; palliative care consults; and, hospice use. **Hypotheses:** *A higher proportion of patients in the intervention phase (vs. control) will: (1) complete advance care plans (primary outcome), (2) have documented resuscitation preferences, (3) have palliative care consults, (4) enroll in hospice over the course of one year of follow-up, and (5) have documented health care proxies.*

**Aim 2a:** The manual chart review activity is intended only for the patients whose caregiver participated in the survey activity. It is distinctive from the NLP activities described in our protocol which identify ACP documentation from the free-text of clinical notes. The chart review will involve a thorough human review of structured ACP elements such as DNR/DNI order, MOLST/POLST and Health Care Proxy form completion in each patient's chart.

**Aim 2b:** To characterize caregiver-centered outcomes of patients with ADRD/Delirium, including: (1) knowledge, (2) confidence in future care, (3) communication satisfaction, (4) decisional satisfaction, and (5) decisional conflict in 600 caregivers of patients with ADRD/Delirium admitted to the hospital. **Hypothesis:** *Intervention phase caregivers of patients with ADRD/Delirium (vs. control) will have higher knowledge, confidence, communication satisfaction, decisional satisfaction, and lower decisional conflict.*

**IMPACT:** COVID-19 poses a unique dilemma for older Americans and patients with ADRD/Delirium and their caregivers, who must balance their desire to live against the risk of a lonely and potentially traumatic hospital death. Video decision support is a practical, evidence-based, and innovative approach to assist patients facing such choices. We have a highly experienced team and infrastructure at BMC and North Shore to execute this proposal. If proven

196 effective, this innovative care model can be immediately deployed across the country to improve  
197 the quality of care for millions of Americans. Given the urgency of the need for scalable  
198 interventions, this study will provide the evidence quickly and efficiently to improve care rapidly  
199 across the country.

200

## 201 4.2 Study Outcome Measures

202

### 203 4.2.1 Primary Outcome Measures

204

205 The primary outcome of this trial is ACP documentation any time during the index hospitalization  
206 as ascertained by NLP-assisted EHR review for any qualifying documentation of ACP in the EHR  
207 note (goals of care, advance directive, MOLST/POLST, code status, palliative care or hospice)  
208 (yes versus no).

209

### 210 4.2.2 Secondary Outcome Measures

211

212 Secondary outcomes include:

213

- 213 • Code status preferences (Aim 1)
- 214 • Use of palliative care consult/services (Aim 1)
- 215 • Hospice use (Aim 1)
- 216 • Health Care Proxy (Aim 1)

217

218 Secondary outcomes related to Aim 2a (patients 18+ years admitted to one of the study inpatient  
219 units with ADRD/delirium) include:

220

- 220 • Documentation of ACP Preferences in Electronic Health Record

221

222 Secondary outcomes related to Aim 2b (caregivers of patients with ADRD/Delirium) include:

223

- 223 • ACP knowledge (Aim 2)
- 224 • Confidence in future care (Aim 2)
- 225 • Communication satisfaction (Aim 2)
- 226 • Decisional satisfaction (Aim 2)
- 227 • Decisional conflict (Aim 2)

228

## 229 5 Study Design

230

231 This is pragmatic SW-CRT of a PCE-led, video-assisted COVID-19 ACP intervention in inpatient-  
232 based units (3 medical-surgical wards, Medical ICU, Cardiac ICU, Neurology ICU, step-down  
233 unit) at two hospitals: BMC and North Shore University Hospital (Northwell Health). All inpatients  
234  $\geq 65$  and all patients with ADRD/Delirium  $\geq 18$  who are hospitalized on a unit during the  
235 intervention phase will receive the intervention.

236

237 This 2-year study (2 month data collection and tool preparation, staff training and site  
238 standardization (we are already embedded in both health systems doing similar work; thus this

239 short timeframe is feasible); 16 months rolling recruitment and surveying; 2 months data cleaning  
 240 and analysis, and 4 months manuscript preparation and dissemination of findings) will roll out the  
 241 intervention to 14 randomized inpatient units at 2 sites. Every two months, an additional inpatient  
 242 unit will be added to our intervention at each hospital, i.e., there will be seven waves or "steps";  
 243 for a total of 7 units at each hospital.

244  
 245 Consistent with a SW-CRT with two hospital units per step (cluster), prior to the collection of any  
 246 data in the pre-intervention period, we will generate a set of uniform random numbers for each of  
 247 the seven clusters to be assigned to a starting period for the study intervention. There will be  
 248 eight study periods in total with a usual care period at the start of the study for all clusters. The  
 249 first randomized intervention period will then begin in period two.

250

|         | Baseline | 14 Months of Clustered Intervention Expansion |    |    |    |     |     |     |
|---------|----------|-----------------------------------------------|----|----|----|-----|-----|-----|
| Cluster | M0       | M2                                            | M4 | M6 | M8 | M10 | M12 | M14 |
| 1       |          |                                               |    |    |    |     |     |     |
| 2       |          |                                               |    |    |    |     |     |     |
| 3       |          |                                               |    |    |    |     |     |     |
| 4       |          |                                               |    |    |    |     |     |     |
| 5       |          |                                               |    |    |    |     |     |     |
| 6       |          |                                               |    |    |    |     |     |     |
| 7       |          |                                               |    |    |    |     |     |     |

251

252 The data needed to assess the outcomes for all patients will be derived from each hospital's  
 253 EHR (Aim 1).

254

255 For Aim 2b, 600 caregivers of patients with ADRD/Delirium (300 control phase; 300 intervention  
 256 phase) will be surveyed by telephone during (or within one week of) the index hospitalization to  
 257 assess caregiver-centered outcomes.

258

259 Each day PCEs, who will be nurses or social workers on the palliative care team, will approach  
 260 patients who are currently hospitalized under Aim 1 or Aim 2a. The PCE will then proactively use  
 261 the goals-of-care video decision aid (or any of the additional videos regarding CPR, hospice,  
 262 dementia, etc., as relevant and in the appropriate language) to provide educational support and  
 263 assist in delivering primary palliative care services relating to goals-of-care conversations and  
 264 ACP documentation. The videos range from 4-6 minutes in length and the PCE will watch the  
 265 videos together with the patient and caregiver on an iPad (or remotely via telehealth with the  
 266 caregiver).(130)

267

268 The PCE will arrange all video showings to include patient and caregiver (when possible and  
 269 acceptable to the patient); when patients are unable to view a video (e.g., loss of capacity,  
 270 delirium), the caregiver will view the video. The videos do not replace clinician counseling;  
 271 indeed, they are designed to allow the PCE to confirm comprehension and to stimulate



272 conversation with a shared vocabulary. The PCE will then communicate the patient's or  
273 caregiver's wishes to the treating primary medical team to coordinate care.

274  
275 In cases when the PCE deems that engagement with the full palliative care team is warranted,  
276 they will approach the treating primary medical team to place the consult. If/when the PCE  
277 exhausts the automated list for patients, they will coordinate with the palliative care consult team  
278 to select patients from the list of requested consultations. The PCE role will be fully integrated  
279 into existing hospital practices at our sites consistent with the pragmatic nature of this study  
280 design.

281  
282 For Aim 1, the study population will consist of patients 65 years or older who are admitted to one  
283 of the study inpatient units in the hospital. For Aim 2a, the study population will consist of any  
284 patient  $\geq 18$  years admitted to one of the study inpatient units in the hospital with a diagnosis of  
285 ADRD/Delirium. For Aim 2b, the study population will consist of adult ( $\geq 18$ ) caregivers of patients  
286 identified in Aim 2a. These caregivers will be recruited to complete a phone survey for our  
287 secondary caregiver outcomes

288  
289 The data needed to assess the outcomes for all patients aged 65 or over will be derived from  
290 each hospital's EHR (Aim 1). For Aim 2, 600 caregivers (300 control phase; 300 intervention  
291 phase) will be surveyed in-person (or remotely) during the index hospitalization to assess  
292 caregiver-centered outcomes.

293

## 294 6 Potential Risks and Benefits

295

### 296 6.1 Risks

297 The potential risks are minimal given the fact that the intervention promotes learning about  
298 medical care for patients, improves communication for patients and their families regarding  
299 advance care planning and self-determination, and the concordance between patient's wishes  
300 and the care they receive.

301 The major potential risk for subjects is loss of confidentiality. Loss of confidentiality is very  
302 unlikely because specific procedures have been implemented by the research team to prevent  
303 such disclosure and these measures will be maintained during the proposed study. Another risk  
304 in Aim 1 is being upset by the intervention videos/questions. Probability of this occurrence is  
305 minimal. We have conducted a series of clinical trials for patients with advanced illnesses and  
306 have rarely had patients get upset due to the topic. In each of these cases, the participant was  
307 interested in continuing after a short break.

308 For subjects enrolled in Aim 2, there is a risk that they could become upset or saddened by some  
309 of the survey questions.

310

### 311 6.2 Potential Benefits

312

313 This study provides no direct benefit to subjects, however there is the potential for patients and  
314 clinicians in the clinics to benefit from the study by having their treatments better aligned with  
315 their preferences.

316

### 317 6.3 Analysis of Risks in Relation to Benefits

318

319 The minor risks for the participants in this study may be considered counterbalanced by the  
320 potential direct benefits and knowledge gained. The results gleaned from the study are intended  
321 to improve the ACP of the overall inpatient population, and particularly those with  
322 ADRD/Delirium. Thus, the risk/benefit balance for this study appears favorable.

323

324

## 325 7 Study Subject Selection

326

### 327 7.1 Subject Inclusion Criteria

328

329 Over the two years of the trial, we will examine data on approximately 15,000 patients  $\geq 65$   
330 admitted to these 23\* units for our primary and secondary outcomes (Aim 1). Given the  
331 pragmatic nature of this trial, our inclusion criteria are quite broad and consistent with the goal of  
332 pragmatic trials.

333

334 We will also survey caregivers of 600 patients with ADRD/Delirium to conduct a telephone  
335 administered survey for caregiver-centered outcomes (knowledge, confidence, communication  
336 satisfaction, decisional satisfaction, and decisional conflict) during the index hospitalization.  
337 Caregivers may or may not be designated as ADRD/Delirium legal surrogate decision maker for  
338 the patient (i.e., most patients with ADRD/Delirium do not have a legally designated  
339 representative.) Any adult identified in the EHR as the contact family member or friend will be  
340 eligible to partake in the caregiver survey. Half of surveys will be conducted during the control  
341 period; half during the intervention period. Caregivers will be either English- or Spanish-speaking  
342 adults, which are the languages in which our surveys are validated. For patients in the control  
343 group, surveys will be completed during the hospital stay or within 1 week of discharge. For  
344 patients in the intervention group, the survey will be completed AFTER the PCE intervention, and  
345 up to 1 week after discharge.

346

347 \*14 units (7 per hospital) will be included in the stepped wedge trial, an additional 9 units (3 at  
348 BMC and 6 at NorthShore) will be used to recruit additional control participants only. These  
349 additional units were added due to low recruitment at the start of the study and the decreasing  
350 number of control units as the stepped wedge design progresses. The target enrollment of 600  
351 caregivers is still accurate.

352

353 Adding delirium to the list of eligible diagnoses will also increase the potential number of eligible  
354 subjects. The surveys are applicable to the caregiver of any patient who is not capable of  
355 making their own health decisions; this includes patients who are experiencing any sort of  
356 memory or cognitive decline.

357

## 358 7.2 Subject Exclusion Criteria

359

360 For Aim 1, there are no exclusion criteria.

361

362 For Aim 2a, there are no exclusion criteria.

363

364 For Aim 2b, not speaking English or Spanish, which are the languages in which our surveys are  
365 validated.

366

367 • We will not be including individuals who are not yet adults (infants, children, teenagers)

368 •

369 • We will not be including prisoners

370

## 371 8 Study Intervention

372

373 A palliative care trained provider (a nurse or social worker on the palliative care team) will serve  
374 as the PCE. Using the ACP videos on a tablet via a Video App, the PCE will provide educational  
375 support and assist in delivering primary palliative care services relating to in-the-moment goals-  
376 of-care conversations and ACP documentation for patients that are hospitalized. PCEs will be  
377 members of the Palliative Care team, coordinate daily activities with the team, and report to the  
378 head of the Palliative Care service. PCEs will serve in a triage function to manage cases that can  
379 be handled with educational support for goals-of-care conversations and ACP documentation or  
380 to stimulate full palliative care consultation. PCEs will directly coordinate communication of the  
381 patient's preferences with the treating primary medical team. A key aspect of this trial design is  
382 the fully integrated role into existing hospital practices of the PCE position.

383

384 PCEs will receive Vital Talk intensive communication skills training via a highly structured series  
385 of Zoom conferences. The PCEs will also be trained on use of the ACP certified videos using the  
386 ACP App. Training will instruct clinicians on how to: 1. Introduce the videos to patients and  
387 caregivers; 2. Use the videos as adjuncts to ACP counseling by clinicians; 3. Select the  
388 appropriate video(s) from the entire suite according to patients' needs; and, 4. Prescribe videos  
389 for patients and caregivers using the electronic platform. The suite of ACP videos is designed to  
390 address common ACP decisions confronting patients at risk or with COVID-19 and their  
391 caregivers. The videos also cover all of the decision points surrounding ADRD/Delirium (e.g.,  
392 feeding tubes, resuscitation, etc.). The videos are intended to be an adjunct to clinician  
393 counseling, not to replace it. Suggested videos for clinicians to use with patients will include  
394 goals-of-care videos, general ACP videos, intervention-specific videos such as ventilatory  
395 support or CPR, and hospice videos. PCEs will also have an array of videos to support  
396 caregivers, including videos regarding compassionate extubation if this is relevant.

397

398 The PCE will encourage the patient to make their wishes known to their family or other caregiver  
399 (and will offer to facilitate a call/video-call) and the attending, and that with the patient's

400 permission, will relay their wishes to the treating team in addition to completing ACP  
401 documentation in the EHR. As an integrated part of existing hospital practice, PCE will  
402 communicate with the primary treating team and the palliative care team. When there are  
403 palliative care needs beyond ACP (e.g., symptom control) or if the PCE determines that the  
404 support of the full palliative care team is warranted, the PCE will recommend to the treating team  
405 to place the consult request. The PCE will not be collecting any data for research purposes only.  
406 For QI purposes, the Palliative care consult team will keep tracking documents of the PCE  
407 activities (number of patients seen per day, amount of time spent with each patient, etc). This is  
408 needed for supervisory purposes. These may be reviewed retrospectively by the research team  
409 and compared to research data. In this case, an amendment will be submitted to the IRB to  
410 cover these activities.

411

412

## 413 9 Study Procedures

414

### 415 Eligibility

416 Aim 1 and Aim 2a: Each day, PCEs will review a list of inpatients who are  $\geq 65$  or have a  
417 diagnosis of ADRD/Delirium

418

419 Aim 2b: Study staff will contact identified adult caregivers by phone to describe the survey  
420 activity

421

### 422 Recruitment

423 For Aim 1, all patients over the age of 65 will be included in the trial. For those patients admitted  
424 to wards/units in the intervention phase, the PCE will proceed with primary palliative care and  
425 view the ACP videos with the patients and family. For patients over the age of 65 admitted to  
426 wards/units that are in the control phase, usual care will proceed without the use of the PCE.

427

428 For Aim 2a, we will identify 600 inpatients to the study units with ADRD/Delirium who are 18+  
429 years old.

430 For Aim 2b, 300 caregivers of the patients identified in Aim 2a will be surveyed during the control  
431 phase, and 300 caregivers will be surveyed during the intervention phase. For the group of  
432 caregivers (N=600) being surveyed for caregiver-centered outcomes, individual verbal informed  
433 consent will be obtained. The RA will survey caregivers using a validated survey tool. For  
434 patients with ADRD/Delirium and their caregivers that are admitted to a ward/unit that has been  
435 randomized to the intervention, the PCE will proceed with the video intervention.

436

437

438 Recruitment efforts for the caregiver survey (Aim 2) will be limited to English- and Spanish-  
439 speaking caregivers who are able to independently consent to participate in a research study.

440 Research staff will work with the care team on the inpatient units where identified patients  
441 are currently hospitalized. The health care team will locate (either in person or by phone)

442 designated caregivers for identified patients and invite them to participate. A member of the care

443 team will approach the caregiver and ask if they would be interested in getting a phone call from  
444 the research team to get more information about the study. If the caregiver says yes, the RA will  
445 call them, read the recruitment script (attached), and, if the subject is willing, review the consent  
446 form and complete the survey. If the designated caregiver cannot be located to invite to  
447 participate, an invitation letter with opt-out postcard will be mailed to them.

448

#### 449 Informed Consent

450

451 For Aim 1, there are special informed consent considerations in this pragmatic SW-CRT: the  
452 hospital clinical unit is the level of randomization, the intervention is of low risk and will be  
453 implemented as the standard of care for the whole clinical unit, and data for our primary outcome  
454 and related outcomes derived from the EHR are ascertained from existing sources. Thus for this  
455 aspect of our proposal, we will seek a waiver of individual informed consent and HIPAA  
456 authorization after careful review of the criteria to do so as we have previously done successfully  
457 in prior studies. The research involves no more than minimal risk to the subjects as described  
458 above. We do not believe the waiver will adversely affect the rights and welfare of the subjects.  
459 As a pragmatic trial of thousands of hospitalized patients and clinicians, this research could not  
460 practicably be carried out without the waiver nor without access to and use of PHI of patients.

461

462 For Aim 2a, we will seek a waiver of individual informed consent and HIPAA authorization due to  
463 the fact that this is a low risk activity (chart review), and the target population is incapable of  
464 consent due to a diagnosis of ADRD/Delirium.

465

466 For Aim 2b, verbal informed consent will be obtained for the phone survey. The caregiver survey  
467 should take less than fifteen minutes.

468

#### 469 Natural Language Processing (NLP) Data Collection

470 Over the course of the study, we will review the charts for all enrolled participants. For Aim 1 and  
471 Aim 2a, the inpatient EHR records (including those with ADRD/Delirium) will be analyzed  
472 (approximately 15,000 patients across both sites).

473

474

475 Initial NLP analyses will be done locally at each data collection site (BMC and Northwell) using  
476 software that was developed at DFCI for this purpose. The results of that initial analysis will be  
477 coded and sent as a HIPAA LDS via HIPAA approved cloud folders such as Box.com to our NLP  
478 partners at DFCI. Each site will retain a local mastercode file that will not be shared with anyone  
479 outside the institution. Patients will be assigned a unique identifier that will be used on datasets  
480 shared with DFCI.

481

482 DFCI will have a reliance agreement in place with BUMC and Data Transfer Agreements in place  
483 with both BMC and Northwell.

484

485 Every 2 months (the size of each step; 1 baseline + 7 steps = 8 data transfers) the outcomes of  
486 interest using NLP will be transferred to our data collection site (DFCI). Data on the following  
487 outcomes will be collected until the end of the study period.

488

- 489 • ACP discussion (e.g., goals-of-care discussion, advance directive,  
490 MOLST/POLST, code status, etc.)
- 491 • Resuscitation preferences
- 492 • Palliative care consults
- 493 • Hospice Use
- 494 • Health care proxy discussion

495

496

497 As stated above, direct identifiers will be held at each respective site (BMC researchers can see  
498 BMC identifiers but not North Shore University Hospital's identifiers, and vice versa.) The risks  
499 will be minimal as the data will be stored and analyzed on a HIPAA secure cluster at each site.  
500 None of the data will be stored in paper form. The data and identifiers will be kept for seven  
501 years after the end of the study period on the HIPAA secure cluster computer at each site. After  
502 the seven years, all HIPAA identifiers and all linking codes will be permanently destroyed in  
503 accordance with regulation.

504

#### 505 NLP Validation

506 Prior to the use of NLP for outcome assessment in this trial, we will entrain and validate the NLP  
507 process for each of our two study sites. Specifically, we will use historic note data from a sample  
508 of 20 patients from each site who meet enrollment criteria. We will then measure the validity of  
509 this process by comparing results from human assisted NLP to a human chart review. The goal  
510 of the keyword library validation process is to ensure that the keyword library and abstraction  
511 guidelines accurately represent the language used to communicate information associated study  
512 outcomes. The semi-automated note annotation process will be cross-validated across both  
513 sites. Clinical notes will be the substrate of this process and must be requested from each site's  
514 clinical data warehouse.

515

516 Each site will ensure that the appropriate IRB and Data Sharing protocols are in place before this  
517 activity begins.

518

#### 519 Chart Review

520 EHR data will be extracted by manual chart review on all Aim 2a patients whose caregiver  
521 completes a survey (2b). This survey will be limited to the inpatient stay that generated the  
522 survey, and include the following elements for collection of secondary outcomes:

- 523 • DNR/DNI order
- 524 • MOLST/POLST filed
- 525 • Resuscitation/Intubation preferences
- 526 • Health Care Proxy specified
- 527 • Palliative Care Consult during hospitalization

- 528       • Discharge Disposition

529

530 A detailed chart review instrument is attached to the protocol.

531

### 532 Withdrawal

533 We do not anticipate any circumstances where the caregiver will withdraw from participation in  
534 the study. Study staff will make clear to the caregiver that participation is entirely voluntary and  
535 may be withdrawn at any time.

536

### 537 Masking

538 Due to the nature of the intervention, participants and staff will not be blinded to the intervention.

539

540 The NLP outcomes adjudication process is not fully automated in this study. We are doing a  
541 human-assisted NLP process in which a staff member validates the text presented in the  
542 software as a possible outcome. For NLP analysis, the following steps will be taken to ensure  
543 blinding to study step assignment by the staff member doing the NLP outcome attribution:

544

- 545       • Prior to adjudication activities, names will be coded
- 546       • Annotation will be performed in large batches with all patients enrolled who have clinical  
547       notes to that point.
- 548       • NLP notes for adjudication will not be grouped by Study ID when presented to annotators.  
549       Each note will be annotated individually, without reference to concepts contained in other  
550       notes annotated before or after.
- 551       • When possible, a staff member who did not enroll the participants will perform the  
552       annotation.

553

### 554 Caregiver Surveys

555 Caregivers will be surveyed using a REDcap survey. The REDCap project will be hosted by  
556 BUMC, both sites will enter data into the same project. All subjects will be assigned a unique  
557 identifier that will be entered into REDCap. All other PHI will be retained in a linking file that is  
558 not shared outside the institution.

559

560 Caregiver data will be linked with the associated patient EHR data, but this linking file will be kept  
561 locally, and only HIPAA LDS will be shared with other sites included on this protocol.

562

### 563 Costs/Payment

564 There are no costs to subjects for participating in this study.

565

566 Caregivers will be compensated \$50 for completing the survey.

567

568

569 10 Assessment of Safety and Data Safety Monitoring Plan (DSMP)

570

571 10.1 Definitions

572  
573  
574  
575  
576  
577  
578  
579  
580  
581  
582  
583  
584  
585  
586  
587  
588  
589  
590  
591  
592  
593  
594  
595  
596  
597  
598  
599  
600  
601  
602  
603  
604  
605  
606  
607  
608  
609  
610  
611  
612  
613  
614  
615

The following definitions will be used in the assessment of safety:

ACP is a standard part of clinical care for patients. The caregiver survey, however, is purely a research activity. We have had excellent experiences with prior caregiver surveys. At the same time, it is possible that this survey could make these subjects upset as they consider advance care planning issues for their family member. In the context of this study, an expected adverse event would be if the participant became distraught during the survey administration, to the point of not being able to complete the survey, or asking to end the survey prematurely. In this unlikely event, the event will be documented on an AE Reporting Form and reported per the guidelines outlined below. We do not anticipate any Serious Adverse Events.

*Unanticipated Problem* is defined as an event, experience or outcome that meets **all three** of the following criteria:

- is unexpected; AND
- is related or possibly related to participation in the research; AND
- suggests that the research places subjects or others at a greater risk of harm (including physical, psychological, economic, or social harm) than was previously known or recognized.

*Possibly related* means there is a reasonable possibility that the incident, experience, or outcome may have been caused by the procedures involved in the research

*Unexpected* means the nature, severity, or frequency of the event is not consistent with either:

- the known or foreseeable risk of adverse events associated with the procedures involved in the research that are described in (a) the protocol–related documents, such as the IRB-approved research protocol, any applicable investigator brochure, and the current IRB-approved informed consent document, and (b) other relevant sources of information, such as product labeling and package inserts; or
- the expected natural progression of any underlying disease, disorder, or condition of the subject(s) experiencing the adverse event and the subject’s predisposing risk factor profile for the adverse event.

## 10.2 Safety Review

Both the risks listed in Section 6.1 and unknown risks will be monitored as follows: Participants will be informed that they may decline to answer any question that makes them feel uncomfortable. If any adverse events occur, the Principal Investigator will be notified as soon as possible and a corrective plan will be developed and put to use. All AEs will be reported to the IRB at each continuing review.

## 10.3 Reporting Plans



616  
617 The Principal Investigator at the site where the event occurred will report Unanticipated  
618 Problems, safety monitors' reports, and Adverse Events to the local IRB in accordance with IRB  
619 policies:

- 620 • Unanticipated Problems involving a fatal or life-threatening event will be reported to the  
621 local IRB and to the IRB of record (BMC/BUMC IRB) within 2 days of the site Principal  
622 Investigator learning of the event.
- 623 • Unanticipated Problems not involving a fatal or life-threatening event will be reported to the  
624 local IRB within 7 days of the site Principal Investigator learning of the event.
- 625 • Reports from safety monitors with recommended changes will be reported to the IRB within  
626 7 days of the investigator receiving the report.
- 627 • Adverse Events (including Serious Adverse Events) will be reported in summary at the time  
628 of continuing review, along with a statement that the pattern of adverse events, in total,  
629 does not suggest that the research places subjects or others at a greater risk of harm than  
630 was previously known.
- 631 • Reports from safety monitors with no recommended changes will be reported to the IRB at  
632 the time of continuing review.
- 633 • When reporting to the local IRB the site Principal Investigator will also report to the  
634 administrative study Principal Investigator Dr. Rao. Such reporting will also include all  
635 findings and determinations made by local IRBs.

636  
637 The Principal Investigator will report Unanticipated Problems and Adverse Events to the Data  
638 Safety Monitoring Board at each bi-monthly Board meeting or as established in the DSMB  
639 charter.

640  
641 The Data Safety Monitoring Board will communicate its reports and recommendations per IRB  
642 policies, the DSMB charter, and the study Sponsor.

643  
644 Per the DSMB charter, the Board will meet every six months to review safety issues and study  
645 progress.

#### 646 647 10.4 Stopping Rules

648  
649 The study has no preset stopping rules.

### 650 651 11 Data Handling and Record Keeping

#### 652 653 11.1 Confidentiality

654  
655 Aim 1 Data: Each site (BMC and North Shore Hospital) will collect identifiable EHR data for all  
656 eligible patients as described above. All patients will be assigned a unique identifier, and each  
657 site will retain a linking file that will not be shared outside of the institution, and will only be  
658 accessible to authorized study personnel. At BMC, all data will be stored in password-protected

659 files on a network server located inside the BMC firewall, which is in compliance with data  
660 storage requirements for PHI as defined by BMC. At North Shore, all data will be stored on an  
661 excel spreadsheet that is password protected on Microsoft OneDrive. OneDrive is a HIPAA  
662 compliant platform for data storage and sharing and has been vetted by Northwell Health's  
663 Research IT and Research Compliance teams.

664  
665 At both sites, any paper records containing study data will be stored in a locked cabinet that is  
666 only accessible by the study team. Research participants will be given unique study IDs upon  
667 enrollment. The links between participants and their identities will be kept on password protected  
668 excel sheets on that are also restricted to authorized study personnel. Data that is shared with  
669 external collaborators will be de-identified prior to sending and at least two members of the study  
670 team will review the data to confirm that no PHI is present.

671  
672 All data transfers will be via secure cloud link such as Box.com.

673  
674 Aim 2 Data: All survey data collected at both sites will be entered into a REDCap project housed  
675 at BUMC. Patients will be identified by unique identifier only, but a separate linking file (not in  
676 REDCap) will be kept at each site and not shared outside the institution. This linking file will be  
677 used to link survey data to the associated patient EHR data. When this data is shared with BMC  
678 for data analysis, only a HIPAA LDS will be transferred via secure cloud link such as Box.com.

679  
680 The study monitor or other authorized representatives of the sponsor may inspect all documents  
681 and records required to be maintained by the investigator.

682  
683

## 684 11.2 Source Documents

685  
686 Source documents for this study will consist of electronic health record (EHR) data from each  
687 data collection site (Boston Medical Center and Northshore Medical Center). Data generated by  
688 the methods described in the protocol will NOT be recorded in the subjects' medical records  
689 and/or study progress notes. Data may be transcribed legibly on CRFs supplied for each subject  
690 or directly inputted into an electronic system or any combination thereof.

691  
692

## 693 11.3 Case Report Forms

694  
695 The study CRF will be the primary data collection instrument for the study. All data requested on  
696 the CRF will be recorded. All missing data will be explained. Questions will have a response  
697 option for "Subject chose not to answer" or "Not applicable".

698  
699

CRF List:

|                   |
|-------------------|
| Sociodemographics |
| ACP Knowledge     |
| ACP Engagement    |

|                            |
|----------------------------|
| Confidence in future care  |
| Communication satisfaction |
| Decisional satisfaction    |
| Decisional conflict        |

700

701

702

#### 703 11.4 Study Records Retention

704

705 Study records, both paper and electronic versions, will be retained, per BMC policy, for at least  
706 seven years after completion of the study.

707

#### 708 11.5 Data Management

709

710 Boston Medical Center will serve as the study data repository. A dedicated REDCap database  
711 housed at BMC will be used to manage randomization and survey data entry across all sites.  
712 Data will be regularly checked for errors and completeness.

713

##### 714 Survey Data

715 Survey data from each of the clinical sites will be transmitted via secure, institutionally approved  
716 methods to Boston Medical Center. Identifying information in REDCap will be limited to only what  
717 is necessary for study procedures, and these will only be accessed to conduct study activities  
718 (contact information for study interviews). According to standard REDCap protocols, all access  
719 will be subject to monitoring and reporting. Assurance of confidentiality of information will be  
720 made to all subjects. Data will be handled with the same confidentiality accorded to patients'  
721 medical records.

722

##### 723 Natural Language Processing (NLP) Data

724 The RA and site-PI at each of our two sites, where data is being collected, will extract data every  
725 two months from the EHR and surveys. Each site will maintain and adhere to the process and  
726 procedures for the protection of human subjects and protected health information (PHI) for their  
727 covered entities. All data collected by the RAs will be stored in password protected servers.  
728 Participant identifiers will be kept in separate password protected files and a third linking file will  
729 be maintained. The linking file will also be password protected, access will be minimized, and a  
730 logging feature will be used to identify each user and instance of use. Only the minimum amount  
731 of PHI necessary will be collected from study participants. NLP data from each of the sites will be  
732 processed locally and then a HIPAA LDS of these data will be transferred via secure  
733 institutionally approved methods to Dana Farber Cancer Institute (DFCI) for data management  
734 and then to BMC to be merged with the rest of the study data repository. Data stored on the  
735 Dana Farber server will reside there only for the periods they are required to be there for study  
736 usage. Data will be securely removed from these servers on a per-item basis. Removed data will  
737 be securely transferred to BMC long-term servers for storage.

738

739  
740  
741  
742  
743  
744  
745  
746  
747  
748  
749  
750  
751  
752  
753  
754  
755  
756  
757  
758  
759  
760  
761  
762  
763  
764  
765  
766  
767  
768  
769  
770  
771  
772  
773  
774  
775  
776  
777  
778  
779  
780  
781  
782

Specific procedures protecting subject confidentiality will be as follows:

1. Access to data files will be secured with a password-filing system (that logs entry) and is restricted to authorized staff only.
2. Necessary hard-copy records containing study data of any type will be kept in locked files.
3. Master lists linking subject information with ID number will be numbered consecutively and prepared before data collection (to ensure accurate accounting). These lists will be kept locked, in duplicate, with access only by the PIs and the other investigators at the site.
4. All project staff will sign an oath of confidentiality to ensure their understanding of the terms of confidentiality required. They will be trained in specific procedures to ensure confidentiality.
5. Sign-out procedures for all access to data files will be strictly enforced.
6. All reports and publications will preserve participants' anonymity.

## 12 Statistical Plan

### 12.1 Study Hypotheses

**Aim 1:** To test the effects of a PCE video intervention leveraging video decision aids on the quality of end-of-life care. We will conduct a SW-CRT to evaluate intervention effectiveness by comparing the following outcomes among 15,000 hospitalized patients: ACP documentation; preferences for resuscitation; palliative care consults; and, hospice use. **Hypotheses:** *A higher proportion of patients in the intervention phase (vs. control) will: (1) complete advance care plans (primary outcome), (2) have documented resuscitation preferences, (3) have palliative care consults, (4) enroll in hospice over the course of one year of follow-up, and (5) have documented health care proxies.*

**Aim 2:** To characterize caregiver-centered outcomes of patients with ADRD/Delirium, including: (1) knowledge, (2) confidence in future care, (3) communication satisfaction, (4) decisional satisfaction, and (5) decisional conflict in 600 caregivers of patients with ADRD/Delirium admitted to the hospital. **Hypothesis:** *Intervention phase caregivers of patients with ADRD/Delirium (vs. control) will have higher knowledge, confidence, communication satisfaction, decisional satisfaction, and lower decisional conflict.*

### 12.2 Sample Size Determination

**Statistical power and sample size:** All sample size estimates here assume a minimum of 80% power and a two-sided alpha of 0.05. We employ the method for the computation of sample size for cross-sectional stepped wedge studies comparing intervention to usual care in two-group statistical analyses. This method incorporates information on the number of steps used in the

783 stepped wedge/cluster randomized design, the number of subjects per time period, and the  
784 degree of clustering via the intraclass correlation coefficient (ICC) to compute the design effect,  
785 the factor by which the sample size found to provide sufficient statistical power for a meaningful  
786 intervention difference in outcome assuming independent data is multiplied. For the primary  
787 outcome of the documentation of ACP in the medical record, a sample size of 440 records per  
788 group in a chi-squared test for independent data will provide 80% power at a two-sided alpha of  
789 0.05 to detect a difference in the proportion of subjects with notation of 35% in the intervention  
790 group compared to 25% in the usual care group, values consistent with prior research and  
791 expectation based on clinical data from the two health systems estimated from recent data.  
792 Based on our planned number of steps (7 with one uniformly applied usual care period across all  
793 hospital units), enrollment per study period, and a reasonable ICC of 0.01, the design effect is  
794 2.72. Thus, we will need to obtain outcome data from the records of at least 2394 subjects  
795 overall (1197 per health system) to provide 80% power for our analysis of intervention  
796 effectiveness. We anticipate, however, that as many as 15,000 records will be available for  
797 analysis with respect to the documentation of ACP. Thus, our planned sample size for our  
798 primary records-based analysis on 15,000 records will therefore provide more than adequate  
799 power to test for differences in our primary outcome.

800 Data for Aim 1 is derived from the EHR and as is typical for trials that integrate new initiatives  
801 within the workflow of large institutions in a SW-CRT that does not involve consent. Indeed, we  
802 have been previously approved by multiple IRBs for such activities. Along with our exceedingly  
803 efficient NLP-assisted and human-confirmed software method for EHR data extraction, we can  
804 have a very large study sample with for this activity.

805 Please note: We anticipate the population under study in Aim 1 to exceed that required by a  
806 simple application of the power calculation presented above. However, this is warranted for eight  
807 reasons. First, the size of this observed population gives us the opportunity to examine  
808 intervention effects for less common outcomes. Second, this sample size will allow us to  
809 evaluate potential heterogeneity in treatment effects for subpopulations as small as 20% of the  
810 population. Third, this sample size provides an experimental context in which we will be able to  
811 recruit a population of 600 patients with ADRD/Delirium and their associate caregivers for  
812 surveying. Indeed, to sustain the activities of Aim 2, we need a large population to draw from, as  
813 many of the people under study for Aim 1 would not be eligible for participation in Aim 2. Fourth,  
814 the size of the population for Aim 1 also protects this trial from the potential that we will have  
815 significantly varying sizes of study clusters, a factor that is often neglected in sample size  
816 assessments for SW-CRTs.(145) Indeed, this is a likely phenomenon as hospital units vary  
817 significantly in their population of patients. Fifth, there is minimal risk to human subjects  
818 presented by the expanded sample size for Aim 1. Indeed, this educational intervention is being  
819 spread across the clinical units of our two hospitals in a pragmatic manner as part of the  
820 standard of care. The research activities of Aim 1 involve no direct burden to patients as there is  
821 no consent process and data for this activity will be derived from the EHR. The chief risk is the  
822 loss of confidentiality and robust protections are in place to protect patients from this potential  
823 risk. Sixth, we plan to extend this intervention as a new clinical initiative in our two health  
824 systems in a manner (time per cluster) that has been endorsed by leadership as a reasonable  
825 rate for dissemination (i.e., we are not adding more time). Seventh, we have devised an  
826 exceedingly efficient and accurate method for outcome assessment (i.e., we are not adding more

827 cost). Eighth, we will protect against inappropriate conclusions. We understand that treatment  
828 effect sizes will be more relevant than p-values and that clinical significance is the goal (not  
829 simply statistical significance).(146, 147) We have set an absolute increase of 10%, i.e., an  
830 increase of ACP documentation during the index hospitalization from 25% to 35%, as the  
831 benchmark for clinical significance. **In summary, the size of Aim 1 is needed to be able to do  
832 Aim 2b and we have taken appropriate measures to ensure that the research design for  
833 Aim 1 does not yield consequences for being overpowered.**

834 For the interview survey derived outcomes (knowledge, confidence in future care,  
835 communication satisfaction, decisional satisfaction, and decisional conflict) with approximately  
836 600 subjects available across the 7 “clusters”/steps, the resulting design effect is 2.03 (again,  
837 assuming an ICC of 0.01). For this analysis sample size, the minimum effect size that can be  
838 detected for the uncertainty and knowledge scores separately with 90% power and alpha=0.05  
839 would be 0.53 after applying the design effect. ***In sum, our anticipated sample sizes for both  
840 our primary and secondary aims will provide adequate statistical power to detect  
841 moderately sized and clinically important effects of the intervention and account for the  
842 cluster-randomized nature of our stepped wedge study design.***

843

844

### 845 12.3 Statistical Methods

846

847 **Statistical Analysis:** For the primary analyses of the primary and secondary outcomes, there  
848 will be no crossover of data for subjects from usual care to the intervention during the study; that  
849 is, subjects will only contribute data once during the course of the study, from their index  
850 hospitalization. Similarly, patients who move units during the course of their index hospitalization  
851 will be assigned to contribute intervention time data if they spend at least eight daytime weekday  
852 hours after being identified as meeting the inclusion criterion on a clinical unit where the  
853 intervention is being conducted. Accordingly, data being contributed by patients at each site  
854 during the pre-intervention period and data being contributed by patients after the initiation of the  
855 intervention will be kept separate for initial analyses. However, because we expect some patients  
856 to have multiple hospitalizations during different steps or to different units (i.e., crossover  
857 design), we will perform secondary analyses on all outcomes including data from the index  
858 hospitalization. This will include stratified sensitivity analyses of patients who contribute data (a)  
859 only to control period; (b) only to intervention period; or, (c) to both control and intervention  
860 periods.

861 Given the randomized nature of the stepped wedge design, we will report our results  
862 according to CONSORT guidelines. For the aims of the study that require patient/caregiver  
863 enrollment (Aim 2), we will record the number of people approached, screened, ineligible, and  
864 refusing participation. We will record subject attrition and note all adverse events. We will employ  
865 the intent-to-treat principle in our comparative analyses between the intervention and usual care  
866 groups. All hypothesis tests will employ a two-sided alpha level of 0.05. Given that the primary  
867 aim will be addressed by the analysis of data obtained from available patient records for the  
868 study period, we will examine the distributions of relevant variables focusing on the data relating  
869 to the documentation of ACP, the outcome of this aim. For the secondary aims of the study that  
870 will require enrollment of a caregiver sample for interview (Aim 2), we will examine the

871 distributions of the uncertainty and knowledge scale scores, the outcomes of interest between  
872 intervention and usual care subjects, as well as the distributional characteristics of all other  
873 salient study variables. We will generate descriptive statistics (means, standard deviations,  
874 quantiles for continuous variables; counts and percentages for categorical variables) and  
875 schematic plots (box-and-whisker, quantile-quantile plots). Given the nature of the cluster  
876 randomization that we will employ, we will utilize statistical analytic methods that take the  
877 correlated nature of the data into account as well as the influence of time to account for secular  
878 trends. In this study, we will examine both the health system and hospital unit as clustering  
879 variables, with the hospital unit as the primary clustering variable. We will compare the  
880 intervention and usual care groups on salient variables in order to assess balance in the  
881 distributions of these variables. Variables found to differ between the study groups will be further  
882 evaluated to assess their confounding effects of intervention vs. usual care differences on  
883 outcomes in multivariable analyses for correlated (clustered) data.  
884

885 **Aim 1.** To test the combined effects of a COVID-19 ACP Educator-led, video-assisted palliative  
886 care intervention on rates of: ACP documentation; Medical orders for resuscitation preferences in  
887 the EHR; Palliative Care Consults; and, Hospice use. **Hypothesis:** *A higher proportion of*  
888 *patients in the intervention phase (vs. control) will: complete ACP documentation (primary trial*  
889 *outcome), have documented orders for resuscitation preferences, have palliative care consults,*  
890 *and enroll in hospice.*

891  
892 *Primary outcome: ACP documentation.* In order to formally estimate and test differences in the  
893 proportion of patients with documentation of ACP between the intervention and usual care  
894 groups, we will employ logistic regression models for correlated binary outcome data. These  
895 models will either involve the use of robust variance methods to account for the clustering of  
896 these data by hospital site and/or health system via generalized estimating equations (GEE) or  
897 the inclusion of a random effects terms (in which case, the results will be interpreted as cluster-  
898 specific). Other potential modifiers of the effect of intervention, confounding variables, or  
899 covariates can be added to this model as fixed effects. Although we do not expect effect  
900 modification in the study data, we will examine the potential for such effects (interaction) through  
901 the use of stratified analyses and the inclusion of interaction terms with study group in our  
902 statistical models. Candidate effect modifiers will be specified a priori and will include age,  
903 gender, race/ethnicity, religion, and language. We will also examine and incorporate secular  
904 trend effects, i.e., the effect of time over the course of the study. Statistically significant  
905 interactions with the intervention will be retained and the nature of heterogeneous intervention  
906 effects will be estimated using the interaction model.

907 Based on our prior work in which we exhibited the fact that African-American and Hispanic  
908 patients are at particularly high risk for lower level of knowledge related to ACP, not discussing  
909 ACP with family, not having a health care proxy, and not having ACP documentation, we  
910 anticipate that this intervention may be particularly beneficial for African-American and Hispanic  
911 patients.(115, 131, 132) Accordingly, we will evaluate heterogeneous treatment effects by race  
912 and ethnicity and anticipate having adequate diversity in our study population to make such  
913 assessments. All data regarding Aim 1 will come from the EHR. Our institutions maintain  
914 excellent self-report information regarding race and ethnicity.

915 We will conduct analyses related to potential effect modification as a step in our model  
916 validation process and to identify relationships that can be examined more fully in future  
917 research. Should interactions not be found to be statistically significant, we will fit a main effects-  
918 only model and use it to formally evaluate confounding by applying a change-in-estimates  
919 approach, with a 10% change in estimates being an initial screening criterion. *Secondary*  
920 *outcomes*: Similar procedures will be undertaken to assess intervention effects for the other EHR  
921 derived outcomes (documented orders for resuscitation preferences, palliative care consults,  
922 hospice enrollment, and documented health care proxies).

923 For our primary analysis, we will consider our primary outcome (ACP documentation) and our  
924 secondary outcomes (resuscitation preferences, palliative care, hospice use, and health care  
925 proxies) only for the patient's index hospitalization. However, because we expect some patients  
926 to have multiple rehospitalizations during the same step and may also include intervention time  
927 (i.e., crossover design), we will perform secondary analyses on all of our primary and secondary  
928 outcomes for each patient reviewing all EHR records from the index hospitalization of the patient  
929 until their death (or through study period). We will also perform stratified sensitivity analyses of  
930 patients who contribute only to control period vs. patients who contribute only to intervention  
931 period vs. those that contribute to both control and intervention periods.

932  
933 We will conduct the above analyses on all Aim 1 and Aim 2a patients for the study primary and  
934 secondary outcomes.

935  
936 **Aim 2b.** To characterize detailed caregiver-centered outcomes, including knowledge, confidence  
937 in future care, communication and decisional satisfaction, and decisional certainty in a group of  
938 caregivers of patients with ADRD/Delirium admitted to the hospital. **Hypothesis:** *Caregivers in*  
939 *the intervention phase (vs. control) will have higher knowledge, confidence in future care,*  
940 *improved communication and decisional satisfaction, and less decisional conflict.* For Aim 2b, we  
941 will compare survey responses from intervention and control periods to take into account  
942 clustering within clinical unit and hospital. We will include calendar time and any imbalance from  
943 caregiver characteristics in the model to adjust for the potential confounding factors. We will  
944 account for clustering using methods as described above but will employ linear models for  
945 correlated data fitted via GEE or in mixed models.

946  
947 **Missing data:** We will impute data when missing using multiple imputation techniques. This  
948 approach is one of the statistically principled methods noted in a recent *NEJM* editorial on the  
949 need for such approaches in the analysis of data from RCTs with missing values.(141) This  
950 approach assumes that data are missing either completely at random (MCAR) or at random  
951 (MAR) as a function of non-missing data on available variables in the dataset. We will implement  
952 this process using PROC MI in SAS. We will generate 20 imputed datasets and will conduct our  
953 intent-to-treat analyses per our analysis plan, saving results across datasets so they can be  
954 combined using PROC MIANALYZE in SAS. We will also consider the possibility that data are  
955 missing in a non-ignorable fashion. For example, should more or less symptomatic subjects be  
956 lost to follow-up as a result of treatment – and thus produce results that are biased in a manner  
957 not addressable by the above methods that assume MCAR or MAR data – we will randomly



958 impute data in sensitivity analyses under various alternative scenarios employing multiple  
959 imputation with the combination of analytic results noted above.

960  
961 Reporting dropout and missing data. Whenever a participant in the caregiver interview sample  
962 drops out of the study, we will document the specific reason for dropout, who decided that the  
963 participant would drop out, and whether the dropout involved intervention participation, data  
964 collection, or both. If a participant withdraws from the intervention only, we will continue to collect  
965 data on all outcome measures. All participants included will be accounted for in a CONSORT  
966 diagram.

967

968

### 969 13 Ethics/Protection of Human Subjects

970

971 This study is to be conducted according to applicable U.S. federal regulations and institutional  
972 policies (which are based in federal regulations, guidance, and ICH Good Clinical Practice  
973 guidelines).

974

975 This protocol and any amendments will be submitted to the BMC IRB, for formal approval of the  
976 study conduct. The decision of the IRB concerning the conduct of the study will be made in  
977 writing to the investigator. A copy of the initial IRB approval letter will be provided to the sponsor  
978 before commencement of this study.

979

980 All subjects enrolled for Aim 2 (caregiver survey) will provide verbal informed consent by phone  
981 prior to answering any survey questions. Subjects will be provided with sufficient information and  
982 time to make an informed decision about their participation in this study. These subjects will be  
983 offered to have a copy of the consent form mailed to them (Email or US Mail) to keep for their  
984 records. The consent form will be submitted with the protocol for review and approval by the IRB.  
985 The consent of a subject, using the IRB-approved consent form, must be obtained before that  
986 subject is submitted to any study procedure. Consent will be documented as required by the IRB.

987

988

## 989 Literature References

990

- 991 1. Berger NA, Savvides P, Koroukian SM, et al. Cancer in the elderly. *Transactions of the*  
992 *American Clinical and Climatological Association*. 2006;117:147-55; discussion 155-6.
- 993 2. Richardson S, Hirsch JS, Narasimhan M, et al. Presenting Characteristics, Comorbidities,  
994 and Outcomes Among 5700 Patients Hospitalized With COVID-19 in the New York City Area.  
995 *JAMA*. Apr 22 2020;doi:10.1001/jama.2020.6775
- 996 3. Yabroff KR, Lamont EB, Mariotto A, et al. Cost of care for elderly cancer patients in the  
997 United States. *Journal of the National Cancer Institute*. May 07 2008;100(9):630-41.  
998 doi:10.1093/jnci/djn103
- 999 4. Weissman GE, Crane-Droesch A, Chivers C, et al. Locally Informed Simulation to Predict  
1000 Hospital Capacity Needs During the COVID-19 Pandemic. *Ann Intern Med*. Jul 7 2020;173(1):21-  
1001 28. doi:10.7326/M20-1260
- 1002 5. Dumanovsky T, Augustin R, Rogers M, Lettang K, Meier DE, Morrison RS. The Growth of  
1003 Palliative Care in U.S. Hospitals: A Status Report. *Journal of palliative medicine*. Jan  
1004 2016;19(1):8-15. doi:10.1089/jpm.2015.0351
- 1005 6. Dumanovsky T, Rogers M, Spragens LH, Morrison RS, Meier DE. Impact of Staffing on  
1006 Access to Palliative Care in U.S. Hospitals. *Journal of palliative medicine*. Dec 2015;18(12):998-  
1007 9. doi:10.1089/jpm.2015.0436
- 1008 7. Hua M, Ma X, Morrison RS, Li G, Wunsch H. Association between the Availability of  
1009 Hospital-based Palliative Care and Treatment Intensity for Critically Ill Patients. *Annals of the*  
1010 *American Thoracic Society*. Sep 2018;15(9):1067-1074. doi:10.1513/AnnalsATS.201711-872OC
- 1011 8. Rush B, Berger L, Anthony Celi L. Access to Palliative Care for Patients Undergoing  
1012 Mechanical Ventilation With Idiopathic Pulmonary Fibrosis in the United States. *The American*  
1013 *journal of hospice & palliative care*. Mar 2018;35(3):492-496. doi:10.1177/1049909117713990
- 1014 9. Wong TW, Lang-Brown S, Romo RD, et al. Prognosis Communication in Late-Life  
1015 Disability: A Mixed Methods Study. *J Am Geriatr Soc*. Nov 2017;65(11):2496-2501.  
1016 doi:10.1111/jgs.15025
- 1017 10. Spetz J, Dudley N, Trupin L, Rogers M, Meier DE, Dumanovsky T. Few Hospital Palliative  
1018 Care Programs Meet National Staffing Recommendations. *Health affairs (Project Hope)*. Sep 1  
1019 2016;35(9):1690-7. doi:10.1377/hlthaff.2016.0113
- 1020 11. O'Mahony S, Levine S, Baron A, et al. Palliative Workforce Development and a Regional  
1021 Training Program. *The American journal of hospice & palliative care*. Jan 2018;35(1):138-143.  
1022 doi:10.1177/1049909116685046
- 1023 12. Pawlow P, Dahlin C, Doherty CL, Ersek M. The Hospice and Palliative Care Advanced  
1024 Practice Registered Nurse Workforce: Results of a National Survey. *Journal of hospice and*  
1025 *palliative nursing : JHPN : the official journal of the Hospice and Palliative Nurses Association*.  
1026 Aug 2018;20(4):349-357. doi:10.1097/njh.0000000000000449
- 1027 13. Dudley N, Chapman S, Spetz J. Community-Based Palliative Care Leader Perspectives  
1028 on Staffing, Recruitment, and Training. *Journal of hospice and palliative nursing : JHPN : the*  
1029 *official journal of the Hospice and Palliative Nurses Association*. Apr 2018;20(2):146-152.  
1030 doi:10.1097/njh.0000000000000419
- 1031 14. Szekendi MK, Vaughn J, Lal A, Ouchi K, Williams MV. The Prevalence of Inpatients at 33  
1032 U.S. Hospitals Appropriate for and Receiving Referral to Palliative Care. *Journal of palliative*  
1033 *medicine*. Apr 2016;19(4):360-72. doi:10.1089/jpm.2015.0236
- 1034 15. Patel RV, Kelley AS, Kamal AH. The Denominator: Evolving the Electronic Medical  
1035 Record To Discover Who Needs Palliative Care. *Journal of palliative medicine*. Jan 2018;21(1):9-  
1036 10. doi:10.1089/jpm.2017.0382
- 1037 16. Fadul N, Elsayem AF, Bruera E. Integration of palliative care into COVID-19 pandemic  
1038 planning. *BMJ Support Palliat Care*. Jun 11 2020;doi:10.1136/bmjspcare-2020-002364

- 1039 17. Wendler D, Rid A. Systematic review: the effect on surrogates of making treatment  
1040 decisions for others. *Ann Intern Med.* Mar 1 2011;154(5):336-46. doi:10.7326/0003-4819-154-5-  
1041 201103010-00008
- 1042 18. Shalowitz DI, Garrett-Mayer E, Wendler D. The accuracy of surrogate decision makers: a  
1043 systematic review. *Arch Intern Med.* Mar 13 2006;166(5):493-7. doi:10.1001/archinte.166.5.493
- 1044 19. Cohen G, Russo MJ, Campos JA, Allegri RF. Living with dementia: increased level of  
1045 caregiver stress in times of COVID-19. *Int Psychogeriatr.* Jul 30 2020:1-11.  
1046 doi:10.1017/S1041610220001593
- 1047 20. Park CL, Russell BS, Fendrich M, Finkelstein-Fox L, Hutchison M, Becker J. Americans'  
1048 COVID-19 Stress, Coping, and Adherence to CDC Guidelines. *J Gen Intern Med.* Aug  
1049 2020;35(8):2296-2303. doi:10.1007/s11606-020-05898-9
- 1050 21. Kent EE, Ornstein KA, Dionne-Odom JN. The Family Caregiving Crisis Meets an Actual  
1051 Pandemic. *J Pain Symptom Manage.* Jul 2020;60(1):e66-e69.  
1052 doi:10.1016/j.jpainsymman.2020.04.006
- 1053 22. Dying in America: improving quality and honoring individual preferences near the end of  
1054 life. *Mil Med.* Apr 2015;180(4):365-7. doi:10.7205/MILMED-D-15-00005
- 1055 23. Davison SN. Advance care planning in patients with chronic kidney disease. *Semin Dial.*  
1056 Nov-Dec 2012;25(6):657-63. doi:10.1111/sdi.12039
- 1057 24. Goff SL, Eneanya ND, Feinberg R, et al. Advance Care Planning: A Qualitative Study of  
1058 Dialysis Patients and Families. *Clin J Am Soc Nephrol.* Feb 13 2015;doi:10.2215/cjn.07490714
- 1059 25. Braun UK, McCullough LB, Beyth RJ, Wray NP, Kunik ME, Morgan RO. Racial and ethnic  
1060 differences in the treatment of seriously ill patients: a comparison of African-American,  
1061 Caucasian and Hispanic veterans. *J Natl Med Assoc.* Sep 2008;100(9):1041-51.
- 1062 26. Cohen LM, Germain M, Poppel DM, Woods A, Kjellstrand CM. Dialysis discontinuation  
1063 and palliative care. *Am J Kidney Dis.* Jul 2000;36(1):140-4. doi:10.1053/ajkd.2000.8286
- 1064 27. Cohen LM, Germain MJ, Poppel DM. Practical considerations in dialysis withdrawal: "to  
1065 have that option is a blessing". *Jama.* Apr 23-30 2003;289(16):2113-9.  
1066 doi:10.1001/jama.289.16.2113
- 1067 28. Cohen LM, Ruthazer R, Germain MJ. Increasing hospice services for elderly patients  
1068 maintained with hemodialysis. *J Palliat Med.* Jul 2010;13(7):847-54. doi:10.1089/jpm.2009.0375
- 1069 29. Gillick MR. Advance care planning. *N Engl J Med.* Jan 1 2004;350(1):7-8.  
1070 doi:10.1056/NEJMp038202
- 1071 30. Tulsky JA. Interventions to enhance communication among patients, providers, and  
1072 families. *J Palliat Med.* 2005;8 Suppl 1:S95-102. doi:10.1089/jpm.2005.8.s-95
- 1073 31. Tulsky JA. Improving quality of care for serious illness: findings and recommendations of  
1074 the Institute of Medicine report on dying in America. *JAMA Intern Med.* May 2015;175(5):840-1.  
1075 doi:10.1001/jamainternmed.2014.8425
- 1076 32. Volandes AE, Kennedy WJ, Davis AD, Gillick MR, Paasche-Orlow MK. The new tools:  
1077 What 21st century education can teach us. *Healthc (Amst).* Dec 2013;1(3-4):79-81.  
1078 doi:10.1016/j.hjdsi.2013.07.011
- 1079 33. Sudore R, Le GM, McMahan R, Feuz M, Katen M, Barnes DE. The advance care  
1080 planning PREPARE study among older Veterans with serious and chronic illness: study protocol  
1081 for a randomized controlled trial. *Trials.* Dec 12 2015;16:570. doi:10.1186/s13063-015-1055-9
- 1082 34. Sudore R, Le GM, McMahan R, Feuz M, Katen M, Barnes DE. The advance care  
1083 planning PREPARE study among older Veterans with serious and chronic illness: study protocol  
1084 for a randomized controlled trial. *Trials.* 2015;16(1):570. doi:10.1186/s13063-015-1055-9
- 1085 35. Sudore RL, Barnes DE, Le GM, et al. Improving advance care planning for English-  
1086 speaking and Spanish-speaking older adults: study protocol for the PREPARE randomised  
1087 controlled trial. *BMJ Open.* Jul 11 2016;6(7):e011705. doi:10.1136/bmjopen-2016-011705

- 1088 36. Sudore RL, Boscardin J, Feuz MA, McMahan RD, Katen MT, Barnes DE. Effect of the  
1089 PREPARE Website vs an Easy-to-Read Advance Directive on Advance Care Planning  
1090 Documentation and Engagement Among Veterans: A Randomized Clinical Trial. *JAMA Intern*  
1091 *Med.* Aug 1 2017;177(8):1102-1109. doi:10.1001/jamainternmed.2017.1607
- 1092 37. Sudore RL, Knight SJ, McMahan RD, et al. A novel website to prepare diverse older  
1093 adults for decision making and advance care planning: a pilot study. *J Pain Symptom Manage.*  
1094 Apr 2014;47(4):674-86. doi:10.1016/j.jpainsymman.2013.05.023
- 1095 38. Quintiliani LM MJ, Buitron de la Vega P, Waite K, Armstrong SE, Henault L, Volandes  
1096 AE, Paasche-Orlow M. Feasibility and patient perceptions of video declarations regarding end-of-  
1097 life decisions by hospitalized patients. . *J Palliat Med.* 2017;Accepted
- 1098 39. Givens JL, Kiely DK, Carey K, Mitchell SL. Healthcare proxies of nursing home residents  
1099 with advanced dementia: decisions they confront and their satisfaction with decision-making.  
1100 *Journal of the American Geriatrics Society.* Jul 2009;57(7):1149-55. doi:10.1111/j.1532-  
1101 5415.2009.02304.x
- 1102 40. Teno JM, Clarridge BR, Casey V, et al. Family perspectives on end-of-life care at the last  
1103 place of care. *JAMA : the journal of the American Medical Association.* Jan 7 2004;291(1):88-93.  
1104 doi:10.1001/jama.291.1.88
- 1105 41. Mack JW, Paulk ME, Viswanath K, Prigerson HG. Racial disparities in the outcomes of  
1106 communication on medical care received near death. *Archives of internal medicine.* Sep 27  
1107 2010;170(17):1533-40. doi:10.1001/archinternmed.2010.322
- 1108 42. Kelley AS, Ettner SL, Morrison RS, Du Q, Wenger NS, Sarkisian CA. Determinants of  
1109 medical expenditures in the last 6 months of life. *Annals of internal medicine.* Feb 15  
1110 2011;154(4):235-42. doi:10.7326/0003-4819-154-4-201102150-00004
- 1111 43. Teno JM, Gozalo PL, Bynum JP, et al. Change in end-of-life care for Medicare  
1112 beneficiaries: site of death, place of care, and health care transitions in 2000, 2005, and 2009.  
1113 *JAMA : the journal of the American Medical Association.* Feb 6 2013;309(5):470-7.  
1114 doi:10.1001/jama.2012.207624
- 1115 44. A controlled trial to improve care for seriously ill hospitalized patients. The study to  
1116 understand prognoses and preferences for outcomes and risks of treatments (SUPPORT). The  
1117 SUPPORT Principal Investigators. *JAMA : the journal of the American Medical Association.* Nov  
1118 22-29 1995;274(20):1591-8.
- 1119 45. Smedira NG, Evans BH, Grais LS, et al. Withholding and withdrawal of life support from  
1120 the critically ill. *The New England journal of medicine.* Feb 01 1990;322(5):309-15.  
1121 doi:10.1056/nejm199002013220506
- 1122 46. Wright AA, Zhang B, Ray A, et al. Associations between end-of-life discussions, patient  
1123 mental health, medical care near death, and caregiver bereavement adjustment. *Jama.* Oct 8  
1124 2008;300(14):1665-73. doi:10.1001/jama.300.14.1665
- 1125 47. Mitchell SL, Teno JM, Intrator O, Feng Z, Mor V. Decisions to forgo hospitalization in  
1126 advanced dementia: a nationwide study. *Journal of the American Geriatrics Society.* Mar  
1127 2007;55(3):432-8. doi:10.1111/j.1532-5415.2007.01086.x
- 1128 48. Mack JW, Weeks JC, Wright AA, Block SD, Prigerson HG. End-of-life discussions, goal  
1129 attainment, and distress at the end of life: predictors and outcomes of receipt of care consistent  
1130 with preferences. *Journal of clinical oncology : official journal of the American Society of Clinical*  
1131 *Oncology.* Mar 1 2010;28(7):1203-8. doi:10.1200/jco.2009.25.4672
- 1132 49. Detering KM, Hancock AD, Reade MC, Silvester W. The impact of advance care planning  
1133 on end of life care in elderly patients: randomised controlled trial. *BMJ (Clinical research ed).*  
1134 2010;340:c1345. doi:10.1136/bmj.c1345
- 1135 50. Leung JM, Udris EM, Uman J, Au DH. The effect of end-of-life discussions on perceived  
1136 quality of care and health status among patients with COPD. *Chest.* Jul 2012;142(1):128-33.  
1137 doi:10.1378/chest.11-2222

- 1138 51. Abel J, Pring A, Rich A, Malik T, Verne J. The impact of advance care planning of place  
1139 of death, a hospice retrospective cohort study. *BMJ supportive & palliative care*. Jun  
1140 2013;3(2):168-73. doi:10.1136/bmjspcare-2012-000327
- 1141 52. Silveira MJ, Kim SY, Langa KM. Advance directives and outcomes of surrogate decision  
1142 making before death. *The New England journal of medicine*. Apr 1 2010;362(13):1211-8.  
1143 doi:10.1056/NEJMsa0907901
- 1144 53. Austin CA, Mohottige D, Sudore RL, Smith AK, Hanson LC. Tools to Promote Shared  
1145 Decision Making in Serious Illness: A Systematic Review. *JAMA Intern Med*. Jul  
1146 2015;175(7):1213-21. doi:10.1001/jamainternmed.2015.1679
- 1147 54. Volandes AE, Mitchell SL, Gillick MR, Chang Y, Paasche-Orlow MK. Using video images  
1148 to improve the accuracy of surrogate decision-making: a randomized controlled trial. *J Am Med  
1149 Dir Assoc*. Oct 2009;10(8):575-80. doi:10.1016/j.jamda.2009.05.006
- 1150 55. Volandes AE, Paasche-Orlow M, Gillick MR, et al. Health literacy not race predicts end-  
1151 of-life care preferences. *Journal of palliative medicine*. Jun 2008;11(5):754-62.  
1152 doi:10.1089/jpm.2007.0224
- 1153 56. Volandes AE, Paasche-Orlow MK, Barry MJ, et al. Video decision support tool for  
1154 advance care planning in dementia: randomised controlled trial. *BMJ*. May 28 2009;338:b2159.  
1155 doi:10.1136/bmj.b2159
- 1156 57. Moss AH. Revised dialysis clinical practice guideline promotes more informed decision-  
1157 making. *Clinical journal of the American Society of Nephrology : CJASN*. Dec 2010;5(12):2380-3.  
1158 doi:10.2215/cjn.07170810
- 1159 58. O'Hare AM, Song MK, Kurella Tamura M, Moss AH. Research Priorities for Palliative  
1160 Care for Older Adults with Advanced Chronic Kidney Disease. *Journal of palliative medicine*.  
1161 May 2017;20(5):453-460. doi:10.1089/jpm.2016.0571
- 1162 59. Aitken PV, Jr. Incorporating advance care planning into family practice [see comment].  
1163 *Am Fam Physician*. Feb 01 1999;59(3):605-14, 617-20.
- 1164 60. Emanuel LL, Barry MJ, Stoeckle JD, Ettelson LM, Emanuel EJ. Advance directives for  
1165 medical care--a case for greater use. *N Engl J Med*. Mar 28 1991;324(13):889-95.  
1166 doi:10.1056/NEJM199103283241305
- 1167 61. Sudore RL, Fried TR. Redefining the "planning" in advance care planning: preparing for  
1168 end-of-life decision making. *Ann Intern Med*. Aug 17 2010;153(4):256-61. doi:10.7326/0003-  
1169 4819-153-4-201008170-00008
- 1170 62. Tulskey JA, Beach MC, Butow PN, et al. A Research Agenda for Communication Between  
1171 Health Care Professionals and Patients Living With Serious Illness. *JAMA Intern Med*. Jul 03  
1172 2017;doi:10.1001/jamainternmed.2017.2005
- 1173 63. El-Jawahri A, Podgurski LM, Eichler AF, et al. Use of video to facilitate end-of-life  
1174 discussions with patients with cancer: a randomized controlled trial. *Journal of clinical oncology :  
1175 official journal of the American Society of Clinical Oncology*. Jan 10 2010;28(2):305-10.  
1176 doi:10.1200/JCO.2009.24.7502
- 1177 64. El-Jawahri A, Mitchell SL, Paasche-Orlow MK, et al. A Randomized Controlled Trial of a  
1178 CPR and Intubation Video Decision Support Tool for Hospitalized Patients. *Journal of general  
1179 internal medicine*. Aug 2015;30(8):1071-80. doi:10.1007/s11606-015-3200-2
- 1180 65. Volandes AE, Paasche-Orlow MK, Mitchell SL, et al. Randomized controlled trial of a  
1181 video decision support tool for cardiopulmonary resuscitation decision making in advanced  
1182 cancer. *Journal of clinical oncology : official journal of the American Society of Clinical Oncology*.  
1183 Jan 20 2013;31(3):380-6. doi:10.1200/JCO.2012.43.9570
- 1184 66. Volandes AE, Ariza M, Abbo ED, Paasche-Orlow M. Overcoming educational barriers for  
1185 advance care planning in Latinos with video images. *Journal of palliative medicine*. Jun  
1186 2008;11(5):700-6. doi:10.1089/jpm.2007.0172

- 1187 67. Javier AD, Figueroa R, Siew ED, et al. Reliability and Utility of the Surprise Question in  
1188 CKD Stages 4 to 5. *Am J Kidney Dis*. Jul 2017;70(1):93-101. doi:10.1053/j.ajkd.2016.11.025  
1189 68. Pfeiffer E. A short portable mental status questionnaire for the assessment of organic  
1190 brain deficit in elderly patients. *J Am Geriatr Soc*. Oct 1975;23(10):433-41.  
1191 69. Moss AH. A new clinical practice guideline on initiation and withdrawal of dialysis that  
1192 makes explicit the role of palliative medicine. *J Palliat Med*. Fall 2000;3(3):253-60.  
1193 doi:10.1089/jpm.2000.3.253  
1194 70. Cameron AC, Trivedi PK. *Microeconometrics: Methods and Applications*. Cambridge  
1195 University Press; 2005.  
1196 71. Hui D, Bruera E. Integrating palliative care into the trajectory of cancer care. *Nature*  
1197 *reviews Clinical oncology*. Mar 2016;13(3):159-71. doi:10.1038/nrclinonc.2015.201  
1198 72. Creswell JW, Creswell JW, Elsie de Renzo Orlando Fund. *Qualitative inquiry and*  
1199 *research design : choosing among five approaches*. 3rd ed. SAGE Publications; 2013:xxi, 448 p.  
1200  
1201

## 1 **Summary of VIDEO-PCE Trial Protocol Changes**

2 This supplement details all the amendments that were submitted throughout the course of the trial,  
3 including amendments to the caregiver survey activity which was conducted throughout the course of  
4 the trial but whose results are not presented in this manuscript.

### 5 **PROTOCOL REVISION (07/21/2021)**

6 Summary: This amendment revised the consent form for the caregiver survey activity and finalized  
7 the caregiver survey consent form for North Shore University Hospital. Additionally, Dana-Farber  
8 Cancer Institute was removed from sections 9.3 and 9.4 of the protocol as it was determined that  
9 Dana-Farber Cancer Institute was not engaged in research.

10 Rationale for Changes: These changes were submitted so that the protocol and consent forms best  
11 reflected trial activities.

### 12 **PROTOCOL REVISION (09/27/2021)**

13 Summary: To facilitate remote and continued access to the video decision aids, the trial protocol was  
14 amended to allow inpatient care team members to provide a handout to participants on the  
15 intervention units. This handout provided instructions for accessing the video decision aids after their  
16 discharge.

17 Additionally, this amendment revised the recruitment letter that was mailed to eligible caregivers from  
18 whom we had a mailing address. This revised recruitment letter indicated that a study staff member  
19 would call them within one week of the discharge date to ask if they would like to participate. For  
20 eligible caregivers for whom there was no mailing address, we called them asking if we can send a  
21 letter describing the study.

22 Rationale for Changes: Participants may want to review the video decision aids again at home or in  
23 the future with another clinician. Through providing a handout with instructions about how to access  
24 the video decisions aids after discharge, participants are empowered to return to the video as they  
25 wish.

26 Per the study protocol, the caregiver survey needs to be completed within one week of the hospital  
27 discharge. The original letter does not allow for that short time period as it indicated that caregivers  
28 would be called in two weeks if they did not return the opt out postcard. This amendment clarified that  
29 discrepancy.

### 30 **PROTOCOL REVISION (12/02/2021)**

31 Summary: To approve a Spanish language version of the caregiver survey. The survey was  
32 translated by Datagain and a certificate of accuracy was submitted with the amendment.

33 Rationale for Changes: To expand the reach of the caregiver survey activity to Spanish speaking  
34 caregivers.

### 35 **PROTOCOL REVISION (02/04/2022)**

36 Summary: Additional units were added to recruit caregivers form for the purpose of completing the  
37 caregiver survey activity. The inpatient diagnosis of delirium was added to the list of eligible  
38 diagnoses for the caregiver survey activity.

39 Rationale for Changes: To increase recruitment for caregiver surveys, additional non-study units were  
40 added to recruit control participants and the list of eligible diagnoses was expanded. Three additional

41 non-study units were added at Boston Medical Center and six were added at North Shore University  
42 Hospital.

43 **PROTOCOL REVISION (06/02/2022)**

44 Summary: This amendment increased the worldwide study sample size from 9,600 to 15,600.

45 Rationale for Changes: The sample size in the original application was an estimate based on  
46 retroactive data reports of potentially eligible participants. In June 2022, when nearly a year of study  
47 data was collected, we realized that the actual number of eligible participants was higher than we  
48 originally projected.

49 **PROTOCOL REVISION (10/07/2022)**

50 Summary: Through this amendment, two new study activities were added: 1) an update to the HIPPA  
51 section of the protocol to include an NLP analysis of inpatients notes of patients whose caregiver  
52 completed a survey; 2) a manual chart review activity for the patients of all caregivers enrolled in the  
53 caregiver survey.

54 Rationale for Changes: The expansion of our NLP analysis and the addition of a manual chart review  
55 activity allowed us to better study outcomes for patients whose caregiver completed a survey.

56

57

58
