# Supplementary material for: Video Intervention and Goals-of-Care Documentation in Hospitalized Older Adults: The VIDEO-PCE Randomized Clinical Trial
Source: PubMed Central journal article supplement (PMC10495866; doi:10.1001/jamanetworkopen.2023.32556), 2023-09-11
Supplement: jamanetwopen-e2332556-s002.pdf [file jamanetwopen-e2332556-s002.pdf]

## Supplemental Online Content

Volandes AE, Zupanc SN, Lakin JR, et al. Effect of a video intervention on goals-of-care documentation in hospitalized older adults: the VIDEO-PCE randomized clinical trial. *JAMA Netw Open*. 2023;6(9):e2332556. doi:10.1001/jamanetworkopen.2023.32556

**eFigure.** Protocol for PCE Patient Interaction

**eTable 1.** VIDEO-PCE Trial Intervention Timeline

**eTable 2.** Natural Language Processing Keyword Library

**eTable 3.** Primary Discharge Diagnosis of Eligible Patients

**eTable 4.** List of *ICD-10* Diagnosis Codes Used to Identify ADRD Patients

This supplemental material has been provided by the authors to give readers additional information about their work.

**eFigure.** Protocol for PCE Patient Interaction

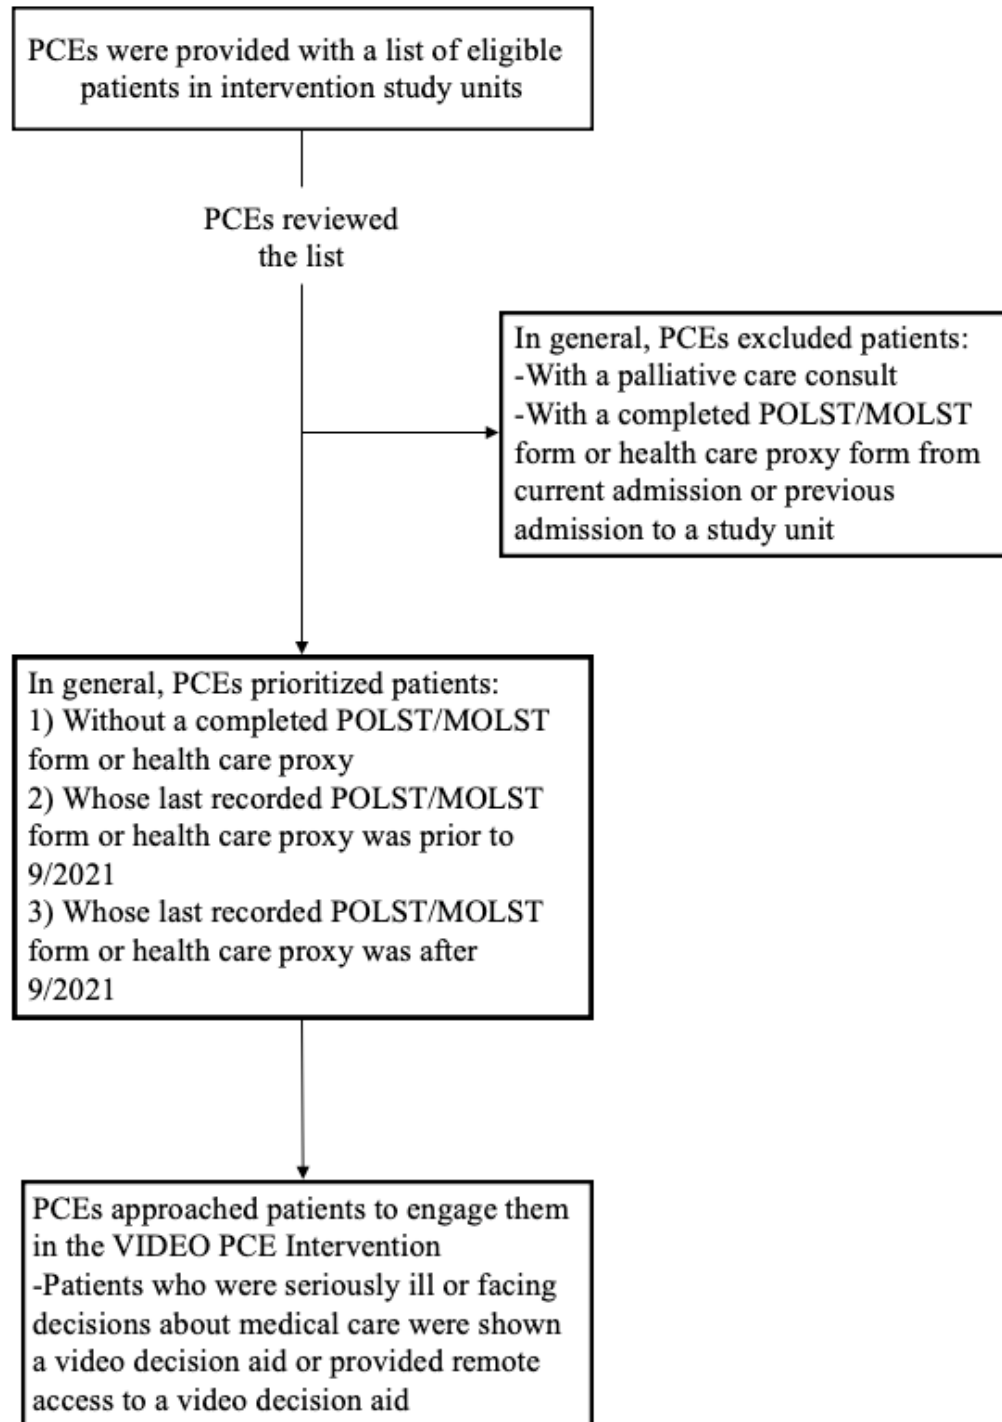

**eTable 1.** VIDEO-PCE Trial Intervention Timeline

| Cluster | 7/1/21 -<br>8/31/21 | 9/1/21 -<br>10/31/21 | 11/1/21 -<br>12/31/21 | 1/1/22 -<br>2/28/22 | 3/1/22 -<br>4/30/22 | 5/1/22-<br>6/30/22 | 7/1/22 -<br>8/31/22 | 9/1/22 -<br>10/31/22 |
|---------|---------------------|----------------------|-----------------------|---------------------|---------------------|--------------------|---------------------|----------------------|
| 1       | Usual Care          | Intervention         | Intervention          | Intervention        | Intervention        | Intervention       | Intervention        | Intervention         |
| 2       | Usual Care          | Usual Care           | Intervention          | Intervention        | Intervention        | Intervention       | Intervention        | Intervention         |
| 3       | Usual Care          | Usual Care           | Usual Care            | Intervention        | Intervention        | Intervention       | Intervention        | Intervention         |
| 4       | Usual Care          | Usual Care           | Usual Care            | Usual Care          | Intervention        | Intervention       | Intervention        | Intervention         |
| 5       | Usual Care          | Usual Care           | Usual Care            | Usual Care          | Usual Care          | Intervention       | Intervention        | Intervention         |
| 6       | Usual Care          | Usual Care           | Usual Care            | Usual Care          | Usual Care          | Usual Care         | Intervention        | Intervention         |
| 7       | Usual Care          | Usual Care           | Usual Care            | Usual Care          | Usual Care          | Usual Care         | Usual Care          | Intervention         |

 Intervention  
 Usual Care

**eTable 2.** Natural Language Processing Keyword Library

| Annotation Domain                         | Definition                                                                                                                                                                                                                                                                                        | BMC Keywords                                                                                                                                                                                                                                                                                                                                                                                                                                                                                                                                                                                                                                                                                                                                                                                                                                                                                                                                                                                                                                                                                                                                                                                                                                                                                                                                                                                                                                                                                                                                                                                       | NHS Keywords                                                                                                                                                                                                                                                                                                                                                                                                                                                                                                                                                                                                                                                                                                                                                                                                                                                                                                                                                                                                                                                                                                                                                                                                                                                                                                                                                                                                                                                                                                                                                                                                                                                                                                   |
|-------------------------------------------|---------------------------------------------------------------------------------------------------------------------------------------------------------------------------------------------------------------------------------------------------------------------------------------------------|----------------------------------------------------------------------------------------------------------------------------------------------------------------------------------------------------------------------------------------------------------------------------------------------------------------------------------------------------------------------------------------------------------------------------------------------------------------------------------------------------------------------------------------------------------------------------------------------------------------------------------------------------------------------------------------------------------------------------------------------------------------------------------------------------------------------------------------------------------------------------------------------------------------------------------------------------------------------------------------------------------------------------------------------------------------------------------------------------------------------------------------------------------------------------------------------------------------------------------------------------------------------------------------------------------------------------------------------------------------------------------------------------------------------------------------------------------------------------------------------------------------------------------------------------------------------------------------------------|----------------------------------------------------------------------------------------------------------------------------------------------------------------------------------------------------------------------------------------------------------------------------------------------------------------------------------------------------------------------------------------------------------------------------------------------------------------------------------------------------------------------------------------------------------------------------------------------------------------------------------------------------------------------------------------------------------------------------------------------------------------------------------------------------------------------------------------------------------------------------------------------------------------------------------------------------------------------------------------------------------------------------------------------------------------------------------------------------------------------------------------------------------------------------------------------------------------------------------------------------------------------------------------------------------------------------------------------------------------------------------------------------------------------------------------------------------------------------------------------------------------------------------------------------------------------------------------------------------------------------------------------------------------------------------------------------------------|
| Goals Conversation                        | <p>Conversations with patients or family members about the patient’s goals, values, or priorities for treatment and outcomes. Includes statements that conversation occurred as well as listing specific goals.</p> <p>OR</p> <p>Advance care planning was discussed, reviewed, or completed.</p> | <p>GOC, goals of care, goals for care, family meeting, family discussion, patient goals, patient values, quality of life, prognostic discussions, illness understanding, serious illness conversation, serious illness discussion, advance care planning, ACP, end of life, what matters most, poor prognosis, limited prognosis, prognosis, prognostic, terminal, dying, die, death, incurable, not curable, not curative, non curable, non-curable, non curative, non-curative, no cure, isn’t a cure, is no cure, not reversible, non-reversible, treatments are palliative, treatment is palliative, palliative treatment, palliation, extend life, extending life, life-extending, life extending, lengthening life, lengthen life, life-lengthening, life lengthening, life limiting, life-limiting, does not wish to know, does not want to know, hours to days, days to weeks, weeks to months, months to years, prognostic understanding, month left, months left, years left, year left, weeks left, week left, unfortunate, regrettably, I am afraid, frank discussion, frank conversation, honest discussion, honest conversation, difficult conversation, difficult discussion, out of options, no remaining options, no more therapy, no further treatment, no further therapy, supportive care, comfort care, comfort approach, CMO, comfort directed care, prioritize comfort, end of life care, comfort measures, limiting invasive procedures, limit invasive procedures, what matters most, discussed, molst, polst, advanced care, advanced directive, advanced directives</p> | <p>GOC, goals of care, goals for care, family meeting, family discussion, patient goals, patient values, quality of life, prognostic discussion, illness understanding, serious illness conversation, serious illness discussion, advance care planning, (?&lt;!I have reviewed the )(?&lt;!documented by the )(?&lt;!d\\/?w )ACPI(?&lt;!documented by the )(?&lt;!d\\/?w )ACP(?! note), end of life, what matters most, poor prognosis, limited prognosis, prognosis, prognostic, terminal, dying, die, incurable, not curable, not curative, non curable, non-curable, non curative, non-curative, no cure, isn’t a cure, is no cure, not reversible, non-reversible, treatments are palliative, treatment is palliative, palliative treatment, palliation, extend life, extending life, life-extending, life extending, life lengthening, life lengthening, life limiting, life-limiting, does not wish to know, does not want to know, hours to days, days to weeks, weeks to months, months to years, prognostic understanding, month left, months left, years left, year left, weeks left, week left, unfortunate, regrettably, I am afraid, frank discussion, frank conversation, honest discussion, honest conversation, difficult conversation, difficult discussion, out of options, no remaining options, no more therapy, no further treatment, no further therapy, supportive care, comfort care, comfort approach, CMO, comfort directed care, prioritize comfort, end of life care, (?&lt;!Treatment: )comfort measures(?! provided), limiting invasive procedures, limit invasive procedures, what matters most, molst, polst, advanced care, advanced directive, advanced directives, QOL</p> |
| Limitations on Life-Sustaining Treatments | <p>Conversations with patients or family members about preferences for limitations to cardiopulmonary resuscitation and intubation.</p>                                                                                                                                                           | <p>Full code, FC, full intubation, full resuscitation, Intubation, resuscitation, CPR, no intubation, no resuscitation, no CPR, declines CPR, do not intubate, do not resuscitate, DNR/DNI, DNR, DNI, declines intubation, declines cardiopulmonary resuscitation, no chest compressions, no compressions, no defibrillation, no mechanical intubation, refuses intubation, refuses CPR, code status discussion, discussed code status, life support, DNAR, do not attempt resuscitation, vent, code status:</p>                                                                                                                                                                                                                                                                                                                                                                                                                                                                                                                                                                                                                                                                                                                                                                                                                                                                                                                                                                                                                                                                                   | <p>Full code, FC, full intubation, full resuscitation, (?&lt;!AMS; )intubation, (?&lt;!IVF )resuscitation, CPR, no intubation, no resuscitation, no CPR, declines CPR, do not intubate, do not resuscitate, DNR/DNI, DNR, DNI, declines intubation, declines cardiopulmonary resuscitation, no chest compressions, no compressions, no defibrillation, no mechanical intubation, refuses intubation, refuses CPR, code status discussion, discussed code status, life support, DNAR, do not attempt resuscitation, code status:</p>                                                                                                                                                                                                                                                                                                                                                                                                                                                                                                                                                                                                                                                                                                                                                                                                                                                                                                                                                                                                                                                                                                                                                                            |
| Palliative Care                           | <p>Mention of a visit with a specialty palliative care clinician, mention of specialist palliative care discussion, or patient preferences regarding seeing a palliative care clinician.</p>                                                                                                      | <p>Palliative care, palliative medicine, pall care, pal care, pallcare, palcare, PC</p>                                                                                                                                                                                                                                                                                                                                                                                                                                                                                                                                                                                                                                                                                                                                                                                                                                                                                                                                                                                                                                                                                                                                                                                                                                                                                                                                                                                                                                                                                                            | <p>Palliative care, palliative medicine, pall care, pal care, pallcare, palcare, PC</p>                                                                                                                                                                                                                                                                                                                                                                                                                                                                                                                                                                                                                                                                                                                                                                                                                                                                                                                                                                                                                                                                                                                                                                                                                                                                                                                                                                                                                                                                                                                                                                                                                        |
| Time-Limited Trial                        | <p>Conversations with patients or family members about the use of a treatment or procedure for a set amount of time.</p>                                                                                                                                                                          | <p>time-limited trial, time limited trial, limited trial, TLT</p>                                                                                                                                                                                                                                                                                                                                                                                                                                                                                                                                                                                                                                                                                                                                                                                                                                                                                                                                                                                                                                                                                                                                                                                                                                                                                                                                                                                                                                                                                                                                  | <p>time-limited trial, time limited trial, limited trial, TLT</p>                                                                                                                                                                                                                                                                                                                                                                                                                                                                                                                                                                                                                                                                                                                                                                                                                                                                                                                                                                                                                                                                                                                                                                                                                                                                                                                                                                                                                                                                                                                                                                                                                                              |
| Hospice                                   | <p>Statements mentioning a discussion of hospice, prior enrollment in hospice, patient preferences regarding hospice, or assessments of hospice eligibility.</p>                                                                                                                                  | <p>Hospice, bridge to hospice, home hospice, inpatient hospice, hospice house, hospice at home</p>                                                                                                                                                                                                                                                                                                                                                                                                                                                                                                                                                                                                                                                                                                                                                                                                                                                                                                                                                                                                                                                                                                                                                                                                                                                                                                                                                                                                                                                                                                 | <p>Hospice(?! patient\\ s*No\\ s*\\ (? \\ s*\\ ), bridge to hospice, home hospice, inpatient hospice, hospice house, hospice at home</p>                                                                                                                                                                                                                                                                                                                                                                                                                                                                                                                                                                                                                                                                                                                                                                                                                                                                                                                                                                                                                                                                                                                                                                                                                                                                                                                                                                                                                                                                                                                                                                       |

**eTable 3.** Primary Discharge Diagnosis of Eligible Patients

|                                                                                                     | <b>No. (%)</b>                   |                                    |                                 |
|-----------------------------------------------------------------------------------------------------|----------------------------------|------------------------------------|---------------------------------|
|                                                                                                     | <b>Usual Care<br/>(n = 4779)</b> | <b>Intervention<br/>(n = 6023)</b> | <b>Overall<br/>(n = 10,802)</b> |
| <b>Primary Discharge Diagnosis</b>                                                                  |                                  |                                    |                                 |
| Certain Infectious and Parasitic Diseases                                                           | 349 (7.3%)                       | 372 (6.2%)                         | 721 (6.7%)                      |
| Neoplasms                                                                                           | 129 (2.7%)                       | 215 (3.6%)                         | 344 (3.2%)                      |
| Diseases of the Blood and Blood-Forming Organs and Certain Disorders Involving the Immune Mechanism | 116 (2.4%)                       | 142 (2.4%)                         | 258 (2.4%)                      |
| Endocrine, Nutritional and Metabolic Diseases                                                       | 199 (4.2%)                       | 221 (3.7%)                         | 420 (3.9%)                      |
| Mental, Behavioral and Neurodevelopmental Disorders                                                 | 36 (0.8%)                        | 64 (1.1%)                          | 100 (0.9%)                      |
| Diseases of the Nervous System                                                                      | 116 (2.4%)                       | 158 (2.6%)                         | 274 (2.5%)                      |
| Diseases of the Eye and Adnexa                                                                      | 7 (0.1%)                         | 12 (0.2%)                          | 19 (0.2%)                       |
| Diseases of the Ear and Mastoid Process                                                             | 3 (0.1%)                         | 6 (0.1%)                           | 9 (0.1%)                        |
| Diseases of the Circulatory System                                                                  | 1234 (25.8%)                     | 1287 (21.4%)                       | 2521 (23.3%)                    |
| Diseases of the Respiratory System                                                                  | 354 (7.4%)                       | 475 (7.9%)                         | 829 (7.7%)                      |
| Diseases of the Digestive System                                                                    | 384 (8.0%)                       | 501 (8.3%)                         | 885 (8.2%)                      |
| Diseases of the Skin and Subcutaneous Tissue                                                        | 91 (1.9%)                        | 121 (2.0%)                         | 212 (2.0%)                      |
| Diseases of the Musculoskeletal System and Connective Tissue                                        | 138 (2.9%)                       | 222 (3.7%)                         | 360 (3.3%)                      |
| Diseases of the Genitourinary System                                                                | 315 (6.6%)                       | 415 (6.9%)                         | 730 (6.8%)                      |
| Congenital Malformations, Deformations, and Chromosomal Abnormalities                               | 1 (0.0%)                         | 2 (0.0%)                           | 3 (0.0%)                        |
| Symptoms, Signs, and Abnormal Clinical and Laboratory Findings, Not Elsewhere Classified            | 774 (16.2%)                      | 1105 (18.3%)                       | 1879 (17.4%)                    |
| Injury, Poisoning, and Certain Other Consequences of External Causes                                | 281 (5.9%)                       | 324 (5.4%)                         | 605 (5.6%)                      |
| Codes for special purposes                                                                          | 112 (2.3%)                       | 226 (3.8%)                         | 338 (3.1%)                      |
| External Causes of Morbidity                                                                        | 46 (1.0%)                        | 65 (1.1%)                          | 111 (1.0%)                      |
| Factors Influencing Health Status and Contact with Health Services                                  | 69 (1.4%)                        | 72 (1.2%)                          | 141 (1.3%)                      |
| Missing/Not Available                                                                               | 25 (0.5%)                        | 18 (0.3%)                          | 43 (0.4%)                       |

**eTable 4.** List of *ICD-10* Diagnosis Codes Used to Identify ADRD Patients

| <b>Code</b> | <b>Code Description</b>                                                                   |
|-------------|-------------------------------------------------------------------------------------------|
| F01.50      | Vascular dementia without behavioral disturbance                                          |
| F01.51      | Vascular dementia with behavioral disturbance                                             |
| F02.80      | Dementia in other diseases classified elsewhere without behavioral disturbance            |
| F02.81      | Dementia in other diseases classified elsewhere with behavioral disturbance               |
| F03.90      | Unspecified dementia without behavioral disturbance                                       |
| F03.91      | Unspecified dementia with behavioral disturbance                                          |
| G30.0       | Alzheimer's disease with early-onset                                                      |
| G30.1       | Alzheimer's disease with late-onset                                                       |
| G30.8       | Other Alzheimer's disease                                                                 |
| G30.9       | Alzheimer's disease, unspecified                                                          |
| G31.01      | Pick's disease                                                                            |
| G31.09      | Other frontotemporal dementia                                                             |
| G31.1       | Senile degeneration of brain, not elsewhere classified                                    |
| G31.2       | Degeneration of nervous system due to alcohol                                             |
| G31.81      | Alpers disease                                                                            |
| G31.82      | Leigh's disease                                                                           |
| G31.83      | Dementia with Lewy bodies                                                                 |
| G31.84      | Mild cognitive impairment, so stated                                                      |
| G31.85      | Corticobasal degeneration                                                                 |
| G31.89      | Other specified degenerative diseases of nervous system                                   |
| G31.9       | Degenerative disease of nervous system, unspecified                                       |
| G32.0       | Subacute combined degeneration of spinal cord in diseases classified elsewhere            |
| G32.81      | Cerebellar ataxia in diseases classified elsewhere                                        |
| G32.89      | Other specified degenerative disorders of nervous system in diseases classified elsewhere |
| R41.3       | Memory changes                                                                            |
| I69.311     | Memory deficit after cerebral infarction                                                  |
| I69.911     | Memory deficit following unspecified cerebrovascular disease                              |
| I69.111     | Memory deficit following nontraumatic intracerebral hemorrhage                            |
| I69.011     | Memory deficit following nontraumatic subarachnoid hemorrhage                             |
| I69.811     | Memory deficit following other cerebrovascular disease                                    |
| I69.211     | Memory deficit following other nontraumatic intracranial hemorrhage                       |
| F09         | Memory disorder due to organic damage                                                     |
| R41.0       | Disorientation, unspecified                                                               |
| F05         | Delirium due to known physiological condition                                             |
