# Supplementary material for: Video Intervention and Goals-of-Care Documentation in Hospitalized Older Adults: The VIDEO-PCE Randomized Clinical Trial
Source: PubMed Central journal article supplement (PMC10495866; doi:10.1001/jamanetworkopen.2023.32556), 2023-09-11
Supplement: jamanetwopen-e2332556-s003.pdf [file jamanetwopen-e2332556-s003.pdf]

## Data Sharing Statement

Volandes. Effect of a Video Intervention on Goals-of-Care Documentation in Hospitalized Older Adults. *JAMA Netw Open*. Published September 11, 2023.

doi:10.1001/jamanetworkopen.2023.32556

### Data

**Data available:** No

### Additional Information

**Explanation for why data not available:** The data will not be shared because we do not have permission from the involved healthcare systems to share the data.
